# Supplementary material for: Regulatory and coding sequences of TRNP1 co-evolve with brain size and cortical folding in mammals
Source: eLife. 2023 Mar 22;12:e83593. doi: 10.7554/eLife.83593 (PMC10032658; doi:10.7554/eLife.83593)
Supplement: Supplementary file 1. — Source information on TRNP1 protein sequences (1a), primate gDNA (1b), phenotype information (1c) as well as detailed results from PAML (Yang, 1997) (1d) and Coevol (Lartillot and Poujol, 2011) results for TRNP1 and the control proteins (1f, 1e, 1g). [file elife-83593-supp1.xlsx]

## Sheet: Table Legends
Table	Legend
1a	Genome sources of the TRNP1 protein coding sequences
1b	gDNA samples
1c	Phenotype data and its source publications used in this study. In cases where there are multiple sources listed, mean across the individual measurements was calculated. For 11 species, the phenotype data of their close sister species (column "Original species") was used. For 3 additional species with only missing GI, this information was borrowed from the indicated sister species (column "GI sour…
1d	TRNP1 amino acid sites under positive selection across the phylogeny according to Naive Empirical Bayes analysis (Yang (1997)) (*: P>95%; **: P>99%)
1e	Pairwise correlations between the substitution rates of TRNP1 (dS: synonymous substitution rates, omega: the ratio of the non-synonymous over the synonymous substitution rates) and the rate of change in either GI, brain size or body mass estimated either separately across 30 mammalian species or together using Coevol (Lartillot and Poujol (2011))
1f	Summary of control proteins and TRNP1 for the co-evolution analyses. dN, dS and dN/dS were inferred using PAML unconstrained branch model (free-ratios). AlnInfoContent indicates information content of the alignment (the lower, the more gaps and reduced total tree length).
1g	Coevol results of all converged and included control proteins and TRNP1 (125). The included correlations are always between the respective trait and the omega of the respective protein.

## Sheet: 1a
	Species	Genome Source	Genome Assembly
1	Callithrix jacchus	NCBI	ASM275486v1
2	Castor canadensis	NCBI	C.can genome v1.0
3	Cebus capucinus	Ensembl41	Cebus_imitator-1.0
4	Cercocebus atys	Ensembl41	Caty_1.0
5	Cercopithecus mitis	targeted resequencing, Enard Lab	-
6	Chlorocebus aethiops	targeted resequencing, Enard Lab	-
7	Chlorocebus sabeus	NCBI	chlSab2
8	Dasypus novemcinctus	NCBI	dasNov3
9	Delphinapterus leucas	NCBI	ASM228892v3
10	Elephantulus edwardii	NCBI	EleEdw1.0
11	Erythrocebus patas	NCBI	EryPat_v1_BIUU
12	Felis catus	Ensembl41	Felis_catus_9.0
13	Gorilla gorilla	NCBI	Susie3
14	Heterocephalus glaber	NCBI	hetGla2
15	Homo sapiens	targeted resequencing, Enard Lab	-
16	Lipotes vexillifer	NCBI	Lipotes_vexillifer_v1
17	Macaca fascicularis	Ensembl41	Macaca_fascicularis_5.0
18	Macaca leonia	targeted resequencing, Enard Lab	-
19	Macaca mulatta	NCBI	rheMac8
20	Macaca nemestrina	Ensembl41	Mnem_1.0
21	Mandrillus sphinx	targeted resequencing, Enard Lab	-
22	Microcebus murinus	NCBI	micMur2
23	Mus caroli	Ensembl41	CAROLI_EIJ_v1.1
24	Mus musculus	NCBI	mm10
25	Mus pahari	Ensembl41	PAHARI_EIJ_v1.1
26	Mus spretus	Ensembl41	SPRET_EiJ_v1
27	Mustela putorius	targeted resequencing, Enard Lab	-
28	Odocoileus virginianus	NCBI	Ovir.te_1.0
29	Orcinus orca	NCBI	Oorc_1.1
30	Otolemur garnettii	NCBI	otoGar3
31	Pan troglodytes	NCBI	panTro6
32	Panthera pardus	Ensembl41	PanPar1.0
33	Papio anubis	targeted resequencing, Enard Lab	-
34	Papio hamadryas	NCBI	papHam1
35	Phoca vitulina	NCBI	GSC_HSeal_1.0
36	Physeter catodon	NCBI	Physeter_macrocephalus-2.0.2
37	Piliocolobus tephrosceles	NCBI	ASM277652v1
38	Pongo abelii	NCBI	ponAbe3
39	Procavia capensis	NCBI	proCap1
40	Propithecus coquereli	Ensembl41	Pcoq_1.0
41	Rattus norvegicus	NCBI	rn6
42	Sus scrofa	NCBI	susScr3
43	Theropithecus gelada	NCBI	Tgel_1.0
44	Tursiops truncatus	NCBI	Tur_tru v1
45	Zalophus californianus	NCBI	zalCal2.2

## Sheet: 1b
	Family	Species	Source
1	Apes	Homo sapiens	Deutsches Krebsforschungszentrum
2	Apes	Pan troglodytes	MPI Evolutionary Anthropology Leipzig
3	Apes	Pan paniscus	MPI Evolutionary Anthropology Leipzig
4	Apes	Gorilla gorilla	MPI Evolutionary Anthropology Leipzig
5	Apes	Pongo abelii	MPI Evolutionary Anthropology Leipzig
6	Apes	Symphalangus syndactylus	MPI Evolutionary Anthropology Leipzig
7	Apes	Nomascus gabriellae	MPI Evolutionary Anthropology Leipzig
8	Apes	Hylobates agilis	MPI Evolutionary Anthropology Leipzig
9	Old World Monkeys	Papio anubis	Deutsches Primatenzentrum Goettingen
10	Old World Monkeys	Papio hamadryas	MPI Evolutionary Anthropology Leipzig
11	Old World Monkeys	Mandrillus sphinx	MPI Evolutionary Anthropology Leipzig
12	Old World Monkeys	Cercocebus chrysogaster	Deutsches Primatenzentrum Goettingen
13	Old World Monkeys	Macaca mulatta	MPI Evolutionary Anthropology Leipzig
14	Old World Monkeys	Macaca arctoides	Deutsches Primatenzentrum Goettingen
15	Old World Monkeys	Macaca leonia	Deutsches Primatenzentrum Goettingen
16	Old World Monkeys	Macaca sylvanus	Deutsches Primatenzentrum Goettingen
17	Old World Monkeys	Macaca nemestrina	MPI Evolutionary Anthropology Leipzig
18	Old World Monkeys	Cercopithecus cephus	Deutsches Primatenzentrum Goettingen
19	Old World Monkeys	Cercopithecus mitis	Deutsches Primatenzentrum Goettingen
20	Old World Monkeys	Chlorocebus aethiops	Deutsches Primatenzentrum Goettingen
21	Old World Monkeys	Colobus guereza	Deutsches Primatenzentrum Goettingen
22	Old World Monkeys	Semnopithecus entellus	Deutsches Primatenzentrum Goettingen
23	Old World Monkeys	Pygathrix nemaeus	Deutsches Primatenzentrum Goettingen
24	New World Monkeys	Alouatta caraya	Deutsches Primatenzentrum Goettingen
25	New World Monkeys	Lagothrix cana	Deutsches Primatenzentrum Goettingen
26	New World Monkeys	Ateles fusciceps	Deutsches Primatenzentrum Goettingen
27	New World Monkeys	Cebus apella	MPI Evolutionary Anthropology Leipzig
28	New World Monkeys	Saimiri sciureus	MPI Evolutionary Anthropology Leipzig
29	New World Monkeys	Aotus azarae	MPI Evolutionary Anthropology Leipzig
30	New World Monkeys	Saguinus oedipus	Deutsches Primatenzentrum Goettingen
31	New World Monkeys	Callimico goeldii	Deutsches Primatenzentrum Goettingen
32	New World Monkeys	Callithrix jacchus	Deutsches Primatenzentrum Goettingen
33	New World Monkeys	Pithecia pithecia	Deutsches Primatenzentrum Goettingen
34	Mustelids	Mustela putorius furo	Stefan Stricker, Helmholz Center Munich

## Sheet: 1c
Species	Original species	Body mass(g)	Brain size(g)	EQ	Brain, body mass source	GI	GI source
Alouatta caraya		2955.00	45.60	1.80	Warnke (1908)	1.47	Lewitus et.al (2014) (A.seninculus)
Aotus azarae	A.trivirgatus	783.60	17.40	1.67	Lewitus et.al (2014)	1.31	Lewitus et.al (2014)
Ateles fusciceps		9026.50	113.60	2.12	Crile Quiring (1940)	1.68	Lewitus et.al (2014) (A.paniscus)
Bos taurus		596666.67	462.00	0.52	Lewitus et.al (2014)	2.53	Lewitus et.al (2014)
Callimico goeldii		492.20	10.95	1.43	Lewitus et.al (2014)	1.25	Lewitus et.al (2014)
Callithrix jacchus		288.12	7.61	1.43	Lewitus et.al (2014)	1.17	Lewitus et.al (2014)
Canis lupus	C.latrans	10750.00	86.23	1.43	Lewitus et.al (2014)	1.80	Lewitus et.al (2014)
Castor canadensis		21750.00	41.17	0.43	Lewitus et.al (2014)	1.02	Lewitus et.al (2014)
Cebus apella		2589.00	71.30	3.07	Bronson (1981),Rilling and Insel (1999),Warnke (1908)	1.60	Rilling and Insel (1999)
Cebus capucinus		1879.00	70.21	3.75	Crile Quiring (1940),Hrdlicka (1925)	1.69	Zilles et al. (1989) (C.albifrons)
Cercocebus atys		3792.86	100.80	3.36	Hrdlicka (1925),Warnke (1908)	1.84	Rilling and Insel (1999)
Cercopithecus cephus		1915.00	57.50	3.03	Hrdlicka (1925)
Cercopithecus mitis		5041.29	67.00	1.85	Lewitus et.al (2014)	1.78	Lewitus et.al (2014)
Chlorocebus aethiops		3452.67	64.13	2.28	Bronson (1981),Warnke (1908)
Chlorocebus sabeus		3042.80	73.61	2.84	Hrdlicka (1925),Warnke (1908)
Colobus guereza		10281.25	83.90	1.43	Boddy el al. (2012)
Dasypus novemcinctus		3762.00	10.75	0.36	Lewitus et.al (2014)	1.07	Lewitus et.al (2014)
Delphinapterus leucas		636000.00	2083.00	2.24	Manger (2006)
Elephantulus edwardii	E.fuscipes	57.00	1.33	0.74	Lewitus et.al (2014)	1.00	Lewitus et.al (2014)
Equus ferus	E.caballus	367000.00	712.00	1.11	Lewitus et.al (2014)	2.80	Lewitus et.al (2014)
Erinaceus europaeus		801.00	3.50	0.33	Lewitus et.al (2014)	1.00	Lewitus et.al (2014)
Erythrocebus patas		7421.40	105.65	2.25	Lewitus et.al (2014)	1.91	Lewitus et.al (2014)
Felis catus		3183.33	31.18	1.17	Lewitus et.al (2014)	1.50	Lewitus et.al (2014)
Gorilla gorilla		99648.40	477.44	1.78	Lewitus et.al (2014)	2.26	Lewitus et.al (2014)
Heterocephalus glaber		41.67	0.46	0.31	Kverkova et al. (2018)
Homo sapiens		61770.32	1300.00	6.68	Lewitus et.al (2014)	2.56	Lewitus et.al (2014)
Hylobates agilis		5528.75	88.10	2.28	Hrdlicka (1925)
Lagothrix cana	L.lagothricha	5959.00	95.58	2.35	Lewitus et.al (2014)	1.97	Lewitus et.al (2014)
Lipotes vexillifer		180000.00	558.00	1.40	Manger (2006)
Loxodonta africana		3775000.00	5253.56	1.72	Lewitus et.al (2014)	3.84	Lewitus et.al (2014)
Macaca arctoides		7630.00	100.70	2.10	Bronson (1981)
Macaca fascicularis		3109.45	66.93	2.55	Bronson (1981),Hrdlicka (1925),Warnke (1908)	1.65	Ventura-Antunes et al. (2013)
Macaca leonia		2050.00	90.00	4.53	Warnke (1908)
Macaca mulatta		7102.83	89.22	1.95	Lewitus et.al (2014)	1.75	Rilling and Insel (1999)
Macaca nemestrina		4456.00	110.00	3.29	Spitzka (1903),Warnke (1908)
Macaca sylvanus		11200.00	87.70	1.42	Warnke (1908)
Macropus eugenii		6500.00	23.70	0.55	Lewitus et.al (2014)	1.13	Lewitus et.al (2014)
Mandrillus sphinx		12125.00	159.40	2.44	Lewitus et.al (2014)	2.14	Lewitus et.al (2014)
Microcebus murinus		71.83	1.85	0.88	Lewitus et.al (2014)	1.10	Lewitus et.al (2014)
Mus musculus		22.25	0.55	0.57	Lewitus et.al (2014)	1.03	Lewitus et.al (2014)
Mustela putorius		809.00	8.25	0.77	Lewitus et.al (2014)	1.63	Brodmann (1913)
Odocoileus virginianus		87000.00	160.00	0.65	Lewitus et.al (2014)	2.27	Lewitus et.al (2014)
Orcinus orca		2049000.00	5617.00	2.76	Manger (2006)
Oryctolagus cuniculus		2000.00	6.50	0.33	Lewitus et.al (2014)	1.15	Lewitus et.al (2014)
Otolemur garnettii	O.crassicaudatus	952.43	10.60	0.89	Lewitus et.al (2014)	1.25	Lewitus et.al (2014)
Ovis aries		63966.67	125.00	0.63	Lewitus et.al (2014)	1.94	Lewitus et.al (2014)
Pan paniscus		39700.00	329.70	2.28	Rilling and Insel (1999),Boddy el al. (2012)	2.17	Rilling and Insel (1999)
Pan troglodytes		41057.09	392.06	2.65	Lewitus et.al (2014)	2.46	Lewitus et.al (2014)
Papio anubis		13829.29	179.10	2.51	Bronson (1981),Hrdlicka (1925),Boddy el al. (2012),Stephan et al. (1981)	2.00	Zilles et al. (1989)
Papio hamadryas		16000.00	182.00	2.31	Lewitus et.al (2014)	1.99	Lewitus et.al (2014)
Phoca vitulina		115000.00	273.75	0.93	Lewitus et.al (2014)	2.38	Lewitus et.al (2014)
Piliocolobus tephrosceles	P.badius	7854.83	76.75	1.57	Lewitus et.al (2014)	1.80	Lewitus et.al (2014)
Pongo abelii	P.pygmaeus	42447.67	347.75	2.30	Lewitus et.al (2014)	2.21	Lewitus et.al (2014)
Procavia capensis		3420.00	19.17	0.68	Lewitus et.al (2014)	1.37	Lewitus et.al (2014)
Propithecus coquereli	P.verreauxi	3547.12	26.90	0.94	Lewitus et.al (2014)	1.34	Lewitus et.al (2014)
Pteropus vampyrus	P.giganteus	1038.75	9.00	0.71	Lewitus et.al (2014)	1.25	Lewitus et.al (2014)
Pygathrix nemaeus		8481.67	84.83	1.65	Lewitus et.al (2014)	1.64	Lewitus et.al (2014)
Rattus norvegicus		314.67	2.41	0.43	Lewitus et.al (2014)	1.02	Lewitus et.al (2014)
Saguinus oedipus		368.83	9.80	1.56	Lewitus et.al (2014)	1.20	Lewitus et.al (2014)
Saimiri boliviensis		750.00	24.10	2.38	Boddy el al. (2012)
Saimiri sciureus		680.60	22.98	2.42	Lewitus et.al (2014)	1.55	Lewitus et.al (2014)
Sarcophilus harrisii			15.00		Zilles et al. (1989)	1.33	Brodmann (1913)
Semnopithecus entellus		7010.00	111.50	2.46	Warnke (1908)
Sorex araneus		9.00	0.20	0.38	Lewitus et.al (2014)	1.00	Lewitus et.al (2014)
Sus scrofa		133600.00	137.65	0.42	Lewitus et.al (2014)	2.16	Lewitus et.al (2014)
Symphalangus syndactylus		12172.00	134.80	2.06	Hrdlicka (1925),Boddy el al. (2012)
Tarsius syrichta		112.05	3.83	1.35	Lewitus et.al (2014)	1.10	Lewitus et.al (2014)
Theropithecus gelada		7710.00	130.00	2.69	Hrdlicka (1925)
Trichechus manatus		797000.00	382.00	0.35	Lewitus et.al (2014)	1.02	Lewitus et.al (2014)
Tupaia belangeri	T.glis	173.33	3.03	0.80	Lewitus et.al (2014)	1.06	Lewitus et.al (2014)
Tursiops truncatus		177500.00	1489.00	3.77	Lewitus et.al (2014)	4.76	Lewitus et.al (2014)
Zalophus californianus		140000.00	363.00	1.08	Lewitus et.al (2014)	2.52	Lewitus et.al (2014)

## Sheet: 1d
Alignment position	Pr(omega>1)	post mean omega
35	0.985*	1.04
41	0.995**	1.05
51	0.952*	1.01
58	0.967*	1.02
62	0.995**	1.05
63	0.984*	1.04
86	0.991**	1.04
191	0.980*	1.04

## Sheet: 1e
Parameter 1	Parameter 2	Marginal Correlation	Partial Correlation	Type of Estimate
		(Posterior Probability)	(Posterior Probability)
brain mass	omega	0.789 (0.97)	0.744 (0.94)	Separate
brain mass	dS	-0.554 (0.99)	0.012 (0.5)	Separate
omega	dS	-0.599 (0.93)	-0.309 (0.69)	Separate
GI	omega	0.769 (0.98)	0.775 (0.96)	Separate
GI	dS	-0.42 (0.96)	0.093 (0.57)	Separate
omega	dS	-0.525 (0.91)	-0.335 (0.71)	Separate
body mass	omega	0.696 (0.95)	0.677 (0.91)	Separate
body mass	dS	-0.416 (0.94)	0.068 (0.54)	Separate
omega	dS	-0.53 (0.89)	-0.364 (0.73)	Separate
brain mass	omega	0.827 (0.97)	0.403 (0.83)	Combined
body mass	omega	0.755 (0.97)	0.19 (0.65)	Combined
GI	omega	0.748 (0.98)	0.341 (0.77)	Combined
body mass	dS	-0.459 (0.96)	0.266 (0.78)	Combined
GI	dS	-0.466 (0.97)	0.17 (0.69)	Combined
omega	dS	-0.537 (0.94)	-0.134 (0.61)	Combined
brain mass	dS	-0.61 (0.99)	-0.321 (0.8)	Combined
GI	brain mass	0.811 (1)	0.306 (0.8)	Combined
brain mass	body mass	0.905 (1)	0.531 (0.9)	Combined
GI	body mass	0.679 (1)	-0.239 (0.8)	Combined

## Sheet: 1f
Protein	dN	dS	dN/dS	AlnInfoContent	propVarSites	converged	redundantGeneCCID	outlier_dS	INCLUDE	isTRNP1
CCDS10029.1	0.0732	3.5032	0.0209	1	0.114	TRUE	FALSE	FALSE	TRUE	FALSE
CCDS10240.1	0.3551	1.826	0.1945	0.996	0.33	TRUE	FALSE	FALSE	TRUE	FALSE
CCDS10274.1	0.3636	2.9696	0.1224	0.999	0.377	TRUE	FALSE	FALSE	TRUE	FALSE
CCDS10282.1	0.0793	5.1303	0.0155	1	0.163	FALSE	FALSE	FALSE	FALSE	FALSE
CCDS10488.1	0.4525	4.2831	0.1056	0.992	0.462	TRUE	FALSE	FALSE	TRUE	FALSE
CCDS10652.1	1.0258	3.9913	0.257	0.886	0.687	TRUE	FALSE	FALSE	TRUE	FALSE
CCDS10735.1	0.0101	1.5516	0.0065	0.999	0.05	TRUE	FALSE	FALSE	TRUE	FALSE
CCDS10847.1	0.1607	3.6283	0.0443	0.906	0.245	TRUE	FALSE	FALSE	TRUE	FALSE
CCDS11587.1	0.4229	3.6295	0.1165	0.989	0.425	TRUE	FALSE	FALSE	TRUE	FALSE
CCDS11869.1	0.5229	3.6605	0.1428	0.992	0.428	TRUE	FALSE	FALSE	TRUE	FALSE
CCDS1204.1	0.1237	3.7367	0.0331	1	0.195	TRUE	FALSE	FALSE	TRUE	FALSE
CCDS12092.1	0.1245	12.6702	0.0098	1	0.187	TRUE	FALSE	FALSE	TRUE	FALSE
CCDS12403.1	0.0643	6.9318	0.0093	0.999	0.106	TRUE	FALSE	FALSE	TRUE	FALSE
CCDS12432.1	0.2548	3.764	0.0677	0.94	0.327	TRUE	FALSE	FALSE	TRUE	FALSE
CCDS12558.1	0.4541	2.9943	0.1517	0.984	0.508	TRUE	FALSE	FALSE	TRUE	FALSE
CCDS1302.1	0.1715	2.454	0.0699	0.997	0.172	TRUE	FALSE	FALSE	TRUE	FALSE
CCDS13139.1	0.6158	3.094	0.199	0.956	0.59	TRUE	FALSE	FALSE	TRUE	FALSE
CCDS13192.1	0.5976	3.1332	0.1907	0.975	0.552	TRUE	FALSE	FALSE	TRUE	FALSE
CCDS13471.1	0.6345	3.1965	0.1985	0.802	0.682	TRUE	FALSE	FALSE	TRUE	FALSE
CCDS13635.1	0.5481	3.7409	0.1465	0.996	0.463	FALSE	FALSE	FALSE	FALSE	FALSE
CCDS14095.1	0.6586	4.9018	0.1344	0.933	0.545	TRUE	FALSE	FALSE	TRUE	FALSE
CCDS1412.1	0.0585	8.8941	0.0066	0.975	0.142	TRUE	FALSE	FALSE	TRUE	FALSE
CCDS1450.1	0.9024	2.6975	0.3345	0.937	0.769	TRUE	FALSE	FALSE	TRUE	FALSE
CCDS1488.1	0.9794	5.5763	0.1756	0.972	0.736	TRUE	FALSE	FALSE	TRUE	FALSE
CCDS1491.1	0.8005	2.1974	0.3643	0.994	0.611	TRUE	FALSE	FALSE	TRUE	FALSE
CCDS1699.1	0.0059	3.7077	0.0016	1	0.01	FALSE	FALSE	FALSE	FALSE	FALSE
CCDS1791.1	0.2559	3.9769	0.0643	0.999	0.272	TRUE	FALSE	FALSE	TRUE	FALSE
CCDS2128.1	0.7851	3.3091	0.2373	0.987	0.646	TRUE	FALSE	FALSE	TRUE	FALSE
CCDS2198.1	0.0926	5.66	0.0164	0.999	0.119	TRUE	FALSE	FALSE	TRUE	FALSE
CCDS2227.1	0.0181	2.7257	0.0066	1	0.028	TRUE	FALSE	FALSE	TRUE	FALSE
CCDS2644.1	0.0162	2.2264	0.0073	1	0.031	TRUE	FALSE	FALSE	TRUE	FALSE
CCDS2769.1	0.8761	2.9908	0.2929	0.983	0.572	TRUE	FALSE	FALSE	TRUE	FALSE
CCDS288.1	0.1126	4.4754	0.0252	0.999	0.181	TRUE	FALSE	FALSE	TRUE	FALSE
CCDS3012.1	0.3794	2.3429	0.1619	0.984	0.379	TRUE	FALSE	FALSE	TRUE	FALSE
CCDS303.1	0.2197	2.7137	0.081	0.977	0.464	TRUE	FALSE	FALSE	TRUE	FALSE
CCDS30668.1	0.783	3.552	0.2204	0.914	0.651	TRUE	FALSE	FALSE	TRUE	FALSE
CCDS32037.1	1.1993	2.5979	0.4616	0.943	0.797	TRUE	FALSE	FALSE	TRUE	FALSE
CCDS32039.1	1.5725	3.9939	0.3937	0.87	0.84	TRUE	FALSE	FALSE	TRUE	FALSE
CCDS32545.1	0.3186	3.6129	0.0882	0.996	0.309	TRUE	FALSE	FALSE	TRUE	FALSE
CCDS32645.1	0.6724	4.2685	0.1575	0.98	0.622	TRUE	FALSE	FALSE	TRUE	FALSE
CCDS33056.1	0.7974	6.6563	0.1198	0.968	0.549	TRUE	FALSE	FALSE	TRUE	FALSE
CCDS33463.1	0.7431	4.3947	0.1691	0.998	0.527	TRUE	FALSE	FALSE	TRUE	FALSE
CCDS33662.1	0.1755	5.6211	0.0312	0.98	0.221	TRUE	FALSE	FALSE	TRUE	FALSE
CCDS33793.1	0.5557	2.2751	0.2443	0.985	0.575	TRUE	FALSE	FALSE	TRUE	FALSE
CCDS34051.1	0.7845	2.5741	0.3048	0.98	0.608	TRUE	FALSE	FALSE	TRUE	FALSE
CCDS34575.1	1.1064	174.587	0.0063	0.956	0.602	TRUE	FALSE	TRUE	FALSE	FALSE
CCDS35185.1	0.044	4.4314	0.0099	1	0.081	TRUE	FALSE	FALSE	TRUE	FALSE
CCDS3731.1	0.2146	1.9533	0.1099	0.999	0.279	TRUE	FALSE	FALSE	TRUE	FALSE
CCDS382.1	0.7573	4.6088	0.1643	0.998	0.495	TRUE	FALSE	FALSE	TRUE	FALSE
CCDS3961.1	0.5508	3.3611	0.1639	0.966	0.468	TRUE	FALSE	FALSE	TRUE	FALSE
CCDS4095.1	0.1334	2.5438	0.0524	0.999	0.155	TRUE	FALSE	FALSE	TRUE	FALSE
CCDS4119.1	0.7642	4.1324	0.1849	0.902	0.567	TRUE	FALSE	FALSE	TRUE	FALSE
CCDS41759.1	0.4647	2.5425	0.1828	0.997	0.436	TRUE	FALSE	FALSE	TRUE	FALSE
CCDS4179.1	0.151	1.413	0.1069	0.994	0.206	TRUE	FALSE	FALSE	TRUE	FALSE
CCDS4187.1	0.3174	4.7033	0.0675	0.883	0.485	TRUE	FALSE	FALSE	TRUE	FALSE
CCDS4231.1	0.3182	2.7234	0.1168	0.998	0.318	TRUE	FALSE	FALSE	TRUE	FALSE
CCDS43281.1	0.4404	5.8056	0.0759	0.959	0.416	TRUE	FALSE	FALSE	TRUE	FALSE
CCDS4334.1	0.0789	2.0174	0.0391	0.99	0.18	TRUE	FALSE	FALSE	TRUE	FALSE
CCDS4337.1	0.3764	3.225	0.1167	0.891	0.426	TRUE	FALSE	FALSE	TRUE	FALSE
CCDS43866.1	0.4791	4.4372	0.108	0.96	0.526	TRUE	FALSE	FALSE	TRUE	FALSE
CCDS45229.1	0.4472	3.1284	0.1429	0.994	0.426	TRUE	FALSE	FALSE	TRUE	FALSE
CCDS46558.1	0.025	3.7671	0.0066	0.999	0.069	FALSE	FALSE	FALSE	FALSE	FALSE
CCDS47296.1	0.1798	4.881	0.0368	0.992	0.267	TRUE	FALSE	FALSE	TRUE	FALSE
CCDS47319.1	0.2539	2.8067	0.0905	0.99	0.241	TRUE	FALSE	FALSE	TRUE	FALSE
CCDS5186.1	0.0556	3.8279	0.0145	0.996	0.125	TRUE	FALSE	FALSE	TRUE	FALSE
CCDS53439.1	0.0655	2.3128	0.0283	0.996	0.168	FALSE	FALSE	FALSE	FALSE	FALSE
CCDS5368.1	0.5196	3.8207	0.136	0.938	0.5	TRUE	FALSE	FALSE	TRUE	FALSE
CCDS53815.1	0.109	1.9422	0.0561	0.996	0.155	TRUE	FALSE	FALSE	TRUE	FALSE
CCDS53941.1	0.4387	4.235	0.1036	0.97	0.528	TRUE	FALSE	FALSE	TRUE	FALSE
CCDS5421.1	0.7977	5.2423	0.1522	0.89	0.791	TRUE	FALSE	FALSE	TRUE	FALSE
CCDS54444.1	0.6832	4.2655	0.1602	0.98	0.658	TRUE	FALSE	FALSE	TRUE	FALSE
CCDS5451.1	0.8608	2.8809	0.2988	0.978	0.515	TRUE	FALSE	FALSE	TRUE	FALSE
CCDS5560.1	0.2898	7.4656	0.0388	0.99	0.481	TRUE	FALSE	FALSE	TRUE	FALSE
CCDS55639.1	1.0617	2.4426	0.4347	0.976	0.761	TRUE	FALSE	FALSE	TRUE	FALSE
CCDS55939.1	0.5518	4.0709	0.1355	0.982	0.634	TRUE	FALSE	FALSE	TRUE	FALSE
CCDS56011.1	0.7725	8.8409	0.0874	0.989	0.644	TRUE	FALSE	FALSE	TRUE	FALSE
CCDS56397.1	0.0691	6.393	0.0108	1	0.105	TRUE	FALSE	FALSE	TRUE	FALSE
CCDS5704.1	0.109	3.8432	0.0284	1	0.15	TRUE	FALSE	FALSE	TRUE	FALSE
CCDS59451.1	0.8731	2.9763	0.2934	0.982	0.558	TRUE	TRUE	FALSE	FALSE	FALSE
CCDS5973.1	0.345	3.8839	0.0888	0.999	0.337	TRUE	FALSE	FALSE	TRUE	FALSE
CCDS6115.1	0.2216	3.608	0.0614	0.986	0.264	TRUE	FALSE	FALSE	TRUE	FALSE
CCDS6188.1	0.696	3.4234	0.2033	0.948	0.686	TRUE	FALSE	FALSE	TRUE	FALSE
CCDS6310.1	0.6092	2.9046	0.2097	0.966	0.531	TRUE	FALSE	FALSE	TRUE	FALSE
CCDS64082.1	0.2955	2.5095	0.1178	0.939	0.414	TRUE	FALSE	FALSE	TRUE	FALSE
CCDS6436.1	0.7266	3.9082	0.1859	0.999	0.616	TRUE	FALSE	FALSE	TRUE	FALSE
CCDS6530.1	0.2537	3.0503	0.0832	0.998	0.281	TRUE	FALSE	FALSE	TRUE	FALSE
CCDS6559.1	0.2273	2.7098	0.0839	0.998	0.288	TRUE	FALSE	FALSE	TRUE	FALSE
CCDS7037.2	0.2145	3.9916	0.0537	0.978	0.259	TRUE	FALSE	FALSE	TRUE	FALSE
CCDS72780.1	1.1466	2.9913	0.3833	0.934	0.81	TRUE	FALSE	FALSE	TRUE	FALSE
CCDS7400.1	0.7019	5.2241	0.1344	0.98	0.485	TRUE	FALSE	FALSE	TRUE	FALSE
CCDS75237.1	0.27	2.8899	0.0934	0.993	0.369	TRUE	FALSE	FALSE	TRUE	FALSE
CCDS7795.1	0.7386	3.2318	0.2285	0.949	0.746	TRUE	FALSE	FALSE	TRUE	FALSE
CCDS78053.1	0.485	2.6725	0.1815	0.995	0.43	TRUE	FALSE	FALSE	TRUE	FALSE
CCDS7861.1	0.1148	3.6685	0.0313	0.995	0.18	TRUE	FALSE	FALSE	TRUE	FALSE
CCDS7866.1	0.0826	1.7632	0.0468	0.975	0.106	TRUE	FALSE	FALSE	TRUE	FALSE
CCDS8099.1	0.3234	4.2564	0.076	0.961	0.348	TRUE	FALSE	FALSE	TRUE	FALSE
CCDS8220.1	0.4011	4.9175	0.0816	0.995	0.363	TRUE	FALSE	FALSE	TRUE	FALSE
CCDS82287.1	0.2423	4.804	0.0504	1	0.264	TRUE	FALSE	FALSE	TRUE	FALSE
CCDS8410.1	0.033	7.6413	0.0043	0.996	0.154	FALSE	FALSE	FALSE	FALSE	FALSE
CCDS8538.1	0.1926	2.6278	0.0733	0.981	0.317	TRUE	FALSE	FALSE	TRUE	FALSE
CCDS87189.1	0.5352	4.0615	0.1318	0.982	0.576	FALSE	FALSE	FALSE	FALSE	FALSE
CCDS885.1	0.0498	3.8739	0.0129	0.997	0.111	TRUE	FALSE	FALSE	TRUE	FALSE
CCDS8886.1	0.2927	2.3083	0.1268	0.995	0.338	TRUE	FALSE	FALSE	TRUE	FALSE
CCDS9249.1	0.2657	5.2585	0.0505	0.961	0.402	TRUE	FALSE	FALSE	TRUE	FALSE
CCDS9358.1	0.2668	3.5616	0.0749	0.995	0.318	TRUE	FALSE	FALSE	TRUE	FALSE
CCDS939.1	0.4417	3.804	0.1161	0.993	0.423	TRUE	FALSE	FALSE	TRUE	FALSE
CCDS9396.1	0.066	1.7443	0.0378	0.982	0.147	TRUE	FALSE	FALSE	TRUE	FALSE
CCDS9463.1	0.1751	2.2408	0.0781	0.994	0.237	TRUE	FALSE	FALSE	TRUE	FALSE
CCDS9491.1	0.3967	3.1023	0.1279	0.991	0.37	TRUE	FALSE	FALSE	TRUE	FALSE
CCDS9555.1	0.7198	3.0313	0.2375	0.979	0.524	TRUE	FALSE	FALSE	TRUE	FALSE
CCDS9695.1	0.0025	1.4051	0.0018	1	0.006	FALSE	FALSE	FALSE	FALSE	FALSE
CCDS9996.1	1.281	6.4212	0.1995	0.9	0.732	TRUE	FALSE	FALSE	TRUE	FALSE
CCDS41289.1	0.4345	4.0629	0.1069	0.94	0.492	TRUE	FALSE	FALSE	TRUE	TRUE
CCDS11320.1	0.0849	2.5076	0.0339	1	0.131	TRUE	FALSE	FALSE	TRUE	FALSE
CCDS11976.1	0.2026	3.9248	0.0516	0.987	0.253	TRUE	FALSE	FALSE	TRUE	FALSE
CCDS12424.1	0.5007	6.2823	0.0797	0.972	0.633	TRUE	FALSE	FALSE	TRUE	FALSE
CCDS2596.1	0.2376	2.068	0.1149	0.989	0.5	TRUE	FALSE	FALSE	TRUE	FALSE
CCDS2736.1	0.8466	4.9034	0.1727	0.961	0.667	TRUE	FALSE	FALSE	TRUE	FALSE
CCDS31856.1	0.4041	3.5191	0.1148	0.995	0.383	TRUE	FALSE	FALSE	TRUE	FALSE
CCDS32999.1	0.4512	4.9914	0.0904	0.809	0.534	TRUE	FALSE	FALSE	TRUE	FALSE
CCDS34301.1	0.3041	6.5622	0.0463	0.994	0.321	TRUE	FALSE	FALSE	TRUE	FALSE
CCDS3458.1	0.1685	5.9215	0.0285	0.998	0.152	TRUE	FALSE	FALSE	TRUE	FALSE
CCDS41285.1	0.3848	3.7665	0.1022	0.948	0.446	TRUE	FALSE	FALSE	TRUE	FALSE
CCDS41923.1	0.5679	3.6464	0.1557	0.919	0.475	TRUE	FALSE	FALSE	TRUE	FALSE
CCDS41980.1	0.1388	1.6976	0.0818	0.995	0.588	TRUE	FALSE	FALSE	TRUE	FALSE
CCDS45608.1	0.4585	6.6026	0.0694	0.958	0.674	TRUE	FALSE	FALSE	TRUE	FALSE
CCDS45815.1	0.4198	6.6664	0.063	0.997	0.456	TRUE	FALSE	FALSE	TRUE	FALSE
CCDS5205.1	0.4648	6.0631	0.0767	0.995	0.533	TRUE	FALSE	FALSE	TRUE	FALSE
CCDS53682.1	0.3782	6.1158	0.0618	0.993	0.54	TRUE	FALSE	FALSE	TRUE	FALSE
CCDS5901.1	0.535	5.2987	0.101	0.977	0.553	TRUE	FALSE	FALSE	TRUE	FALSE
CCDS6007.1	0.7092	2.9878	0.2374	0.966	0.717	TRUE	FALSE	FALSE	TRUE	FALSE
CCDS8467.1	0.634	2.2909	0.2767	0.943	0.66	TRUE	FALSE	FALSE	TRUE	FALSE
CCDS86085.1	0.8411	6.1325	0.1372	0.981	0.639	TRUE	FALSE	FALSE	TRUE	FALSE
CCDS9419.1	0.754	4.2902	0.1757	0.924	0.571	TRUE	FALSE	FALSE	TRUE	FALSE
CCDS9518.1	0.2346	9.4435	0.0248	0.996	0.281	TRUE	FALSE	FALSE	TRUE	FALSE

## Sheet: 1g
Protein	Trait	CorrelationCoeff	pp	CorType	Rank	Total	isTRNP1
CCDS6530.1	Brain size	0.953333	1	Marginal	1	125	FALSE
CCDS43866.1	Brain size	0.952	1	Marginal	2	125	FALSE
CCDS53682.1	Brain size	0.903333	1	Marginal	3	125	FALSE
CCDS1488.1	Body mass	0.892667	1	Marginal	1	125	FALSE
CCDS6310.1	Body mass	0.879333	1	Marginal	2	125	FALSE
CCDS43866.1	Body mass	0.877	1	Marginal	3	125	FALSE
CCDS1488.1	Brain size	0.877	0.996667	Marginal	4	125	FALSE
CCDS34051.1	Brain size	0.872333	0.98	Marginal	5	125	FALSE
CCDS6530.1	Body mass	0.861333	1	Marginal	4	125	FALSE
CCDS6310.1	Brain size	0.860667	1	Marginal	6	125	FALSE
CCDS6530.1	GI	0.845667	1	Marginal	1	125	FALSE
CCDS53682.1	GI	0.844	1	Marginal	2	125	FALSE
CCDS53682.1	Body mass	0.843667	1	Marginal	5	125	FALSE
CCDS41289.1	Brain size	0.840667	0.98	Marginal	7	125	TRUE
CCDS45608.1	GI	0.836	1	Marginal	3	125	FALSE
CCDS43866.1	GI	0.826333	1	Marginal	4	125	FALSE
CCDS34051.1	Body mass	0.812667	0.98	Marginal	6	125	FALSE
CCDS31856.1	Brain size	0.803333	0.963333	Marginal	8	125	FALSE
CCDS1302.1	Brain size	0.784667	0.966667	Marginal	9	125	FALSE
CCDS2769.1	Brain size	-0.784	0.983333	Marginal	125	125	FALSE
CCDS7795.1	Brain size	0.771667	0.96	Marginal	10	125	FALSE
CCDS41289.1	Body mass	0.768	0.973333	Marginal	7	125	TRUE
CCDS64082.1	Brain size	-0.767	0.946667	Marginal	124	125	FALSE
CCDS4187.1	Brain size	0.766	0.93	Marginal	11	125	FALSE
CCDS11869.1	Body mass	0.764667	0.966667	Marginal	8	125	FALSE
CCDS41289.1	GI	0.757667	0.983333	Marginal	5	125	TRUE
CCDS2769.1	Body mass	-0.75	0.98	Marginal	125	125	FALSE
CCDS11869.1	Brain size	0.748	0.95	Marginal	12	125	FALSE
CCDS32645.1	Brain size	0.746	0.95	Marginal	13	125	FALSE
CCDS31856.1	Body mass	0.745333	0.963333	Marginal	9	125	FALSE
CCDS12558.1	Body mass	-0.745333	0.98	Marginal	124	125	FALSE
CCDS55639.1	GI	0.745	0.983333	Marginal	6	125	FALSE
CCDS64082.1	Body mass	-0.742333	0.946667	Marginal	123	125	FALSE
CCDS10488.1	Body mass	-0.742	0.976667	Marginal	122	125	FALSE
CCDS12558.1	Brain size	-0.741	0.98	Marginal	123	125	FALSE
CCDS5560.1	Brain size	-0.724	0.99	Marginal	122	125	FALSE
CCDS1488.1	GI	0.719667	0.996667	Marginal	7	125	FALSE
CCDS55639.1	Brain size	0.717667	0.963333	Marginal	14	125	FALSE
CCDS32645.1	Body mass	0.71	0.946667	Marginal	10	125	FALSE
CCDS5560.1	Body mass	-0.709333	0.983333	Marginal	121	125	FALSE
CCDS7795.1	Body mass	0.708	0.956667	Marginal	11	125	FALSE
CCDS11976.1	Brain size	0.702667	0.94	Marginal	15	125	FALSE
CCDS10488.1	Brain size	-0.702667	0.97	Marginal	121	125	FALSE
CCDS45608.1	Brain size	0.701333	0.983333	Marginal	16	125	FALSE
CCDS10652.1	Brain size	0.698667	0.906667	Marginal	17	125	FALSE
CCDS34051.1	GI	0.698667	0.98	Marginal	8	125	FALSE
CCDS4187.1	Body mass	0.698	0.92	Marginal	12	125	FALSE
CCDS12558.1	GI	-0.692	0.983333	Marginal	125	125	FALSE
CCDS9518.1	Body mass	0.691333	0.99	Marginal	13	125	FALSE
CCDS1302.1	Body mass	0.685	0.946667	Marginal	14	125	FALSE
CCDS32645.1	GI	0.684667	0.96	Marginal	9	125	FALSE
CCDS31856.1	GI	0.678	0.963333	Marginal	10	125	FALSE
CCDS1302.1	GI	0.677667	0.966667	Marginal	11	125	FALSE
CCDS12403.1	Brain size	0.671	0.883333	Marginal	18	125	FALSE
CCDS55639.1	Body mass	0.669	0.956667	Marginal	15	125	FALSE
CCDS2736.1	Body mass	-0.668	0.99	Marginal	120	125	FALSE
CCDS11869.1	GI	0.667333	0.956667	Marginal	12	125	FALSE
CCDS14095.1	Brain size	0.664	0.903333	Marginal	19	125	FALSE
CCDS5901.1	Brain size	0.66	0.896667	Marginal	20	125	FALSE
CCDS9518.1	Brain size	0.653667	0.99	Marginal	21	125	FALSE
CCDS6310.1	GI	0.652667	0.99	Marginal	13	125	FALSE
CCDS2769.1	GI	-0.650667	0.973333	Marginal	124	125	FALSE
CCDS10652.1	Body mass	0.649333	0.896667	Marginal	16	125	FALSE
CCDS41285.1	Brain size	0.635	0.87	Marginal	22	125	FALSE
CCDS4187.1	GI	0.632333	0.923333	Marginal	14	125	FALSE
CCDS7795.1	GI	0.632	0.953333	Marginal	15	125	FALSE
CCDS45608.1	Body mass	0.631	0.966667	Marginal	17	125	FALSE
CCDS14095.1	GI	0.630667	0.933333	Marginal	16	125	FALSE
CCDS10274.1	Brain size	-0.627667	0.866667	Marginal	120	125	FALSE
CCDS10274.1	Body mass	-0.626333	0.87	Marginal	119	125	FALSE
CCDS45608.1	GI	0.623333	0.946667	Partial	1	125	FALSE
CCDS12403.1	GI	0.621333	0.903333	Marginal	17	125	FALSE
CCDS64082.1	GI	-0.620667	0.936667	Marginal	123	125	FALSE
CCDS11976.1	Body mass	0.616333	0.92	Marginal	18	125	FALSE
CCDS12092.1	GI	-0.610333	0.98	Marginal	122	125	FALSE
CCDS41285.1	Body mass	0.607333	0.87	Marginal	19	125	FALSE
CCDS13192.1	Body mass	-0.605333	0.893333	Marginal	118	125	FALSE
CCDS5901.1	GI	0.603667	0.91	Marginal	18	125	FALSE
CCDS56011.1	Brain size	0.601667	0.893333	Marginal	23	125	FALSE
CCDS10488.1	GI	-0.601	0.96	Marginal	121	125	FALSE
CCDS56011.1	GI	0.597667	0.93	Marginal	19	125	FALSE
CCDS2736.1	Brain size	-0.596667	0.99	Marginal	119	125	FALSE
CCDS12403.1	Body mass	0.589667	0.86	Marginal	20	125	FALSE
CCDS75237.1	Body mass	-0.585	0.93	Marginal	117	125	FALSE
CCDS13471.1	Brain size	-0.585	0.896667	Marginal	118	125	FALSE
CCDS10652.1	GI	0.582	0.906667	Marginal	20	125	FALSE
CCDS53941.1	Brain size	0.581667	0.84	Marginal	24	125	FALSE
CCDS8886.1	Brain size	-0.579667	0.843333	Marginal	117	125	FALSE
CCDS1791.1	Brain size	-0.578667	0.843333	Marginal	116	125	FALSE
CCDS13192.1	Brain size	-0.574	0.883333	Marginal	115	125	FALSE
CCDS8538.1	Body mass	0.572333	0.85	Marginal	21	125	FALSE
CCDS5901.1	Body mass	0.566667	0.876667	Marginal	22	125	FALSE
CCDS8538.1	Brain size	0.564667	0.846667	Marginal	25	125	FALSE
CCDS11976.1	GI	0.563333	0.926667	Marginal	21	125	FALSE
CCDS8467.1	Brain size	0.559333	0.826667	Marginal	26	125	FALSE
CCDS14095.1	Body mass	0.553	0.863333	Marginal	23	125	FALSE
CCDS6188.1	Body mass	-0.552667	0.886667	Marginal	116	125	FALSE
CCDS9396.1	Brain size	-0.552667	0.833333	Marginal	114	125	FALSE
CCDS1791.1	Body mass	-0.547667	0.84	Marginal	115	125	FALSE
CCDS5560.1	GI	-0.545333	0.966667	Marginal	120	125	FALSE
CCDS8886.1	Body mass	-0.544333	0.84	Marginal	114	125	FALSE
CCDS7037.2	Brain size	-0.544333	0.81	Marginal	113	125	FALSE
CCDS1488.1	Body mass	0.543333	0.886667	Partial	1	125	FALSE
CCDS32999.1	Brain size	-0.540667	0.826667	Marginal	112	125	FALSE
CCDS32999.1	Body mass	-0.54	0.833333	Marginal	112	125	FALSE
CCDS9396.1	Body mass	-0.54	0.836667	Marginal	113	125	FALSE
CCDS47319.1	Brain size	0.536667	0.88	Marginal	27	125	FALSE
CCDS6310.1	Body mass	0.531667	0.89	Partial	2	125	FALSE
CCDS75237.1	Body mass	-0.523333	0.92	Partial	125	125	FALSE
CCDS6188.1	Brain size	-0.522667	0.88	Marginal	111	125	FALSE
CCDS12424.1	GI	0.520667	0.94	Partial	2	125	FALSE
CCDS53941.1	Body mass	0.519	0.826667	Marginal	24	125	FALSE
CCDS5451.1	Brain size	0.518667	0.83	Marginal	28	125	FALSE
CCDS41285.1	GI	0.517667	0.856667	Marginal	22	125	FALSE
CCDS56011.1	Body mass	0.515333	0.846667	Marginal	25	125	FALSE
CCDS13471.1	Body mass	-0.511333	0.85	Marginal	111	125	FALSE
CCDS1450.1	Brain size	-0.510667	0.823333	Marginal	110	125	FALSE
CCDS13192.1	GI	-0.510667	0.886667	Marginal	119	125	FALSE
CCDS30668.1	Brain size	0.509	0.823333	Marginal	29	125	FALSE
CCDS5451.1	GI	0.506667	0.863333	Marginal	23	125	FALSE
CCDS43866.1	Brain size	0.500667	0.88	Partial	1	125	FALSE
CCDS53815.1	Brain size	-0.497667	0.77	Marginal	109	125	FALSE
CCDS53941.1	GI	0.494333	0.853333	Marginal	24	125	FALSE
CCDS9396.1	GI	-0.494	0.84	Marginal	118	125	FALSE
CCDS9518.1	GI	0.491333	0.96	Marginal	25	125	FALSE
CCDS10274.1	GI	-0.491333	0.85	Marginal	117	125	FALSE
CCDS9996.1	Body mass	0.488667	0.896667	Partial	3	125	FALSE
CCDS8467.1	Body mass	0.486	0.806667	Marginal	26	125	FALSE
CCDS5205.1	Brain size	0.485	0.94	Marginal	30	125	FALSE
CCDS5205.1	Body mass	0.483667	0.93	Marginal	27	125	FALSE
CCDS30668.1	Body mass	0.482	0.813333	Marginal	28	125	FALSE
CCDS4231.1	Brain size	-0.479333	0.81	Marginal	108	125	FALSE
CCDS8467.1	GI	0.479333	0.826667	Marginal	26	125	FALSE
CCDS82287.1	GI	-0.475667	0.94	Marginal	116	125	FALSE
CCDS32999.1	GI	-0.474667	0.82	Marginal	115	125	FALSE
CCDS8886.1	GI	-0.469667	0.826667	Marginal	114	125	FALSE
CCDS7037.2	GI	-0.469	0.826667	Marginal	113	125	FALSE
CCDS47319.1	Body mass	0.468333	0.853333	Marginal	29	125	FALSE
CCDS75237.1	Brain size	-0.468333	0.876667	Marginal	107	125	FALSE
CCDS30668.1	GI	0.468	0.823333	Marginal	27	125	FALSE
CCDS53815.1	Body mass	-0.467333	0.766667	Marginal	110	125	FALSE
CCDS72780.1	GI	0.466667	0.813333	Marginal	28	125	FALSE
CCDS12092.1	Brain size	-0.465333	0.93	Marginal	106	125	FALSE
CCDS4231.1	Body mass	-0.465	0.81	Marginal	109	125	FALSE
CCDS6530.1	Brain size	0.464667	0.863333	Partial	2	125	FALSE
CCDS1791.1	GI	-0.462667	0.833333	Marginal	112	125	FALSE
CCDS5186.1	Brain size	0.461667	0.763333	Marginal	31	125	FALSE
CCDS7037.2	Body mass	-0.460333	0.786667	Marginal	108	125	FALSE
CCDS4231.1	GI	-0.458	0.83	Marginal	111	125	FALSE
CCDS1450.1	Body mass	-0.456333	0.806667	Marginal	107	125	FALSE
CCDS13471.1	GI	-0.455667	0.873333	Marginal	110	125	FALSE
CCDS41759.1	Body mass	-0.440667	0.786667	Marginal	106	125	FALSE
CCDS45229.1	Brain size	0.440333	0.77	Marginal	32	125	FALSE
CCDS7861.1	Brain size	0.44	0.756667	Marginal	33	125	FALSE
CCDS5421.1	Brain size	-0.439333	0.773333	Marginal	105	125	FALSE
CCDS41923.1	Brain size	0.439	0.803333	Marginal	34	125	FALSE
CCDS55639.1	GI	0.439	0.84	Partial	3	125	FALSE
CCDS72780.1	Brain size	0.437333	0.766667	Marginal	35	125	FALSE
CCDS53682.1	GI	0.437333	0.846667	Partial	4	125	FALSE
CCDS9419.1	Body mass	0.437	0.783333	Marginal	30	125	FALSE
CCDS33463.1	Brain size	-0.43	0.756667	Marginal	104	125	FALSE
CCDS53815.1	GI	-0.429	0.766667	Marginal	109	125	FALSE
CCDS5186.1	Body mass	0.427	0.76	Marginal	31	125	FALSE
CCDS3458.1	Brain size	0.425	0.76	Marginal	36	125	FALSE
CCDS31856.1	Brain size	0.421667	0.836667	Partial	3	125	FALSE
CCDS1450.1	GI	-0.420667	0.81	Marginal	108	125	FALSE
CCDS9249.1	Brain size	0.42	0.756667	Marginal	37	125	FALSE
CCDS939.1	Brain size	0.42	0.743333	Marginal	38	125	FALSE
CCDS3458.1	Body mass	0.418667	0.76	Marginal	32	125	FALSE
CCDS34051.1	Brain size	0.415333	0.84	Partial	4	125	FALSE
CCDS6115.1	Brain size	0.414333	0.743333	Marginal	39	125	FALSE
CCDS41759.1	Brain size	-0.412333	0.766667	Marginal	103	125	FALSE
CCDS12432.1	Brain size	0.412	0.756667	Marginal	40	125	FALSE
CCDS41289.1	Brain size	0.410667	0.833333	Partial	5	125	TRUE
CCDS9249.1	GI	0.41	0.776667	Marginal	29	125	FALSE
CCDS47319.1	GI	0.406667	0.833333	Marginal	30	125	FALSE
CCDS47319.1	Brain size	0.405667	0.86	Partial	6	125	FALSE
CCDS288.1	Brain size	0.403667	0.743333	Marginal	41	125	FALSE
CCDS9419.1	Brain size	0.402	0.75	Marginal	42	125	FALSE
CCDS11320.1	Brain size	-0.401	0.74	Marginal	102	125	FALSE
CCDS45229.1	Body mass	0.400667	0.76	Marginal	33	125	FALSE
CCDS11976.1	Brain size	0.4	0.84	Partial	7	125	FALSE
CCDS7795.1	Brain size	0.399333	0.823333	Partial	8	125	FALSE
CCDS288.1	GI	0.398	0.763333	Marginal	31	125	FALSE
CCDS7861.1	Body mass	0.398	0.753333	Marginal	34	125	FALSE
CCDS4179.1	Brain size	-0.395667	0.736667	Marginal	101	125	FALSE
CCDS5451.1	Body mass	0.394667	0.78	Marginal	35	125	FALSE
CCDS5421.1	Body mass	-0.394333	0.763333	Marginal	105	125	FALSE
CCDS7861.1	GI	0.394	0.763333	Marginal	32	125	FALSE
CCDS4337.1	Body mass	-0.393667	0.863333	Partial	124	125	FALSE
CCDS56397.1	Brain size	-0.393333	0.89	Partial	125	125	FALSE
CCDS12432.1	GI	0.393	0.766667	Marginal	33	125	FALSE
CCDS12558.1	GI	-0.392333	0.82	Partial	125	125	FALSE
CCDS1302.1	Brain size	0.392	0.826667	Partial	9	125	FALSE
CCDS8538.1	GI	0.392	0.803333	Marginal	34	125	FALSE
CCDS53682.1	Body mass	0.391667	0.81	Partial	4	125	FALSE
CCDS11869.1	Body mass	0.391	0.806667	Partial	5	125	FALSE
CCDS6115.1	GI	0.388	0.753333	Marginal	35	125	FALSE
CCDS2736.1	GI	0.388	0.88	Partial	5	125	FALSE
CCDS5186.1	GI	0.385333	0.756667	Marginal	36	125	FALSE
CCDS32037.1	Brain size	0.384333	0.73	Marginal	43	125	FALSE
CCDS45229.1	GI	0.383667	0.773333	Marginal	37	125	FALSE
CCDS6436.1	Brain size	0.382667	0.73	Marginal	44	125	FALSE
CCDS12092.1	GI	-0.381667	0.856667	Partial	124	125	FALSE
CCDS33463.1	Body mass	-0.381333	0.743333	Marginal	104	125	FALSE
CCDS12432.1	Body mass	0.381	0.746667	Marginal	36	125	FALSE
CCDS64082.1	Brain size	-0.378333	0.803333	Partial	124	125	FALSE
CCDS5205.1	GI	0.372	0.91	Marginal	38	125	FALSE
CCDS11320.1	Body mass	-0.369667	0.73	Marginal	103	125	FALSE
CCDS6530.1	GI	0.368333	0.786667	Partial	6	125	FALSE
CCDS4095.1	Brain size	-0.368	0.72	Marginal	100	125	FALSE
CCDS6115.1	Body mass	0.367667	0.726667	Marginal	37	125	FALSE
CCDS2198.1	Brain size	-0.366	0.713333	Marginal	99	125	FALSE
CCDS13192.1	Body mass	-0.365667	0.793333	Partial	123	125	FALSE
CCDS72780.1	Body mass	0.362333	0.743333	Marginal	38	125	FALSE
CCDS10488.1	Body mass	-0.361667	0.79	Partial	122	125	FALSE
CCDS4179.1	Body mass	-0.361	0.726667	Marginal	102	125	FALSE
CCDS12558.1	Body mass	-0.361	0.8	Partial	121	125	FALSE
CCDS6188.1	Body mass	-0.360667	0.8	Partial	120	125	FALSE
CCDS10240.1	Body mass	-0.360333	0.736667	Marginal	101	125	FALSE
CCDS5205.1	Brain size	0.360333	0.88	Partial	10	125	FALSE
CCDS82287.1	Brain size	-0.359333	0.84	Marginal	98	125	FALSE
CCDS9518.1	Brain size	0.359333	0.866667	Partial	11	125	FALSE
CCDS9249.1	Body mass	0.358667	0.736667	Marginal	39	125	FALSE
CCDS939.1	Body mass	0.358	0.72	Marginal	40	125	FALSE
CCDS32037.1	GI	0.356333	0.743333	Marginal	39	125	FALSE
CCDS3458.1	GI	0.356	0.75	Marginal	40	125	FALSE
CCDS56011.1	GI	0.355667	0.79	Partial	7	125	FALSE
CCDS11587.1	Brain size	-0.355333	0.716667	Marginal	97	125	FALSE
CCDS5704.1	Brain size	-0.355	0.696667	Marginal	96	125	FALSE
CCDS4095.1	Body mass	-0.354	0.72	Marginal	100	125	FALSE
CCDS33463.1	GI	-0.354	0.756667	Marginal	107	125	FALSE
CCDS6188.1	GI	-0.351333	0.82	Marginal	106	125	FALSE
CCDS11869.1	Brain size	0.350667	0.8	Partial	12	125	FALSE
CCDS4179.1	GI	-0.35	0.736667	Marginal	105	125	FALSE
CCDS288.1	Body mass	0.349333	0.723333	Marginal	41	125	FALSE
CCDS9419.1	GI	0.347667	0.75	Marginal	41	125	FALSE
CCDS33056.1	Brain size	-0.346667	0.7	Marginal	95	125	FALSE
CCDS5704.1	Body mass	-0.345667	0.696667	Marginal	99	125	FALSE
CCDS32037.1	Body mass	0.344	0.72	Marginal	42	125	FALSE
CCDS2198.1	GI	-0.343667	0.713333	Marginal	104	125	FALSE
CCDS9463.1	Brain size	0.342667	0.71	Marginal	45	125	FALSE
CCDS41289.1	GI	0.342667	0.77	Partial	8	125	TRUE
CCDS11320.1	GI	-0.342	0.733333	Marginal	103	125	FALSE
CCDS5421.1	GI	-0.341667	0.753333	Marginal	102	125	FALSE
CCDS2128.1	Body mass	-0.341333	0.84	Partial	119	125	FALSE
CCDS939.1	GI	0.341333	0.74	Marginal	42	125	FALSE
CCDS9463.1	GI	0.341333	0.73	Marginal	43	125	FALSE
CCDS5901.1	Brain size	0.34	0.79	Partial	13	125	FALSE
CCDS12424.1	GI	0.339	0.87	Marginal	44	125	FALSE
CCDS2198.1	Body mass	-0.339	0.706667	Marginal	98	125	FALSE
CCDS9996.1	GI	-0.336333	0.9	Marginal	101	125	FALSE
CCDS43281.1	Body mass	0.336	0.736667	Marginal	43	125	FALSE
CCDS10240.1	Brain size	-0.335667	0.72	Marginal	94	125	FALSE
CCDS64082.1	Body mass	-0.335333	0.76	Partial	118	125	FALSE
CCDS33056.1	Body mass	-0.333667	0.7	Marginal	97	125	FALSE
CCDS5560.1	Brain size	-0.332667	0.813333	Partial	123	125	FALSE
CCDS2769.1	Body mass	-0.331667	0.776667	Partial	117	125	FALSE
CCDS12092.1	Body mass	0.33	0.826667	Partial	6	125	FALSE
CCDS2736.1	Body mass	-0.329667	0.82	Partial	116	125	FALSE
CCDS4095.1	GI	-0.328333	0.72	Marginal	100	125	FALSE
CCDS8220.1	Body mass	-0.328333	0.71	Marginal	96	125	FALSE
CCDS14095.1	Brain size	0.328	0.783333	Partial	14	125	FALSE
CCDS78053.1	Brain size	0.327333	0.706667	Marginal	46	125	FALSE
CCDS6436.1	Body mass	0.324667	0.71	Marginal	44	125	FALSE
CCDS11587.1	GI	-0.323333	0.72	Marginal	99	125	FALSE
CCDS11587.1	Body mass	-0.323	0.706667	Marginal	95	125	FALSE
CCDS41923.1	Body mass	0.322333	0.75	Marginal	45	125	FALSE
CCDS43281.1	Body mass	0.322333	0.75	Partial	7	125	FALSE
CCDS32645.1	Brain size	0.322333	0.763333	Partial	15	125	FALSE
CCDS82287.1	GI	-0.321667	0.84	Partial	123	125	FALSE
CCDS75237.1	GI	-0.319333	0.803333	Marginal	98	125	FALSE
CCDS6436.1	GI	0.318667	0.73	Marginal	45	125	FALSE
CCDS2596.1	Brain size	0.316	0.89	Marginal	47	125	FALSE
CCDS55939.1	Body mass	0.313667	0.7	Marginal	46	125	FALSE
CCDS33662.1	Brain size	0.313667	0.696667	Marginal	48	125	FALSE
CCDS9463.1	Body mass	0.312333	0.703333	Marginal	47	125	FALSE
CCDS12403.1	Brain size	0.311667	0.753333	Partial	16	125	FALSE
CCDS78053.1	Body mass	0.310333	0.703333	Marginal	48	125	FALSE
CCDS2596.1	GI	0.307667	0.91	Marginal	46	125	FALSE
CCDS1488.1	Brain size	0.306667	0.753333	Partial	17	125	FALSE
CCDS55939.1	Brain size	0.305	0.693333	Marginal	49	125	FALSE
CCDS1491.1	Brain size	0.304	0.69	Marginal	50	125	FALSE
CCDS9996.1	Brain size	-0.303667	0.786667	Partial	122	125	FALSE
CCDS41923.1	GI	0.303667	0.76	Marginal	47	125	FALSE
CCDS10652.1	Brain size	0.299333	0.763333	Partial	18	125	FALSE
CCDS41759.1	GI	-0.298333	0.726667	Marginal	97	125	FALSE
CCDS4337.1	Body mass	-0.297667	0.816667	Marginal	94	125	FALSE
CCDS32039.1	Body mass	-0.295333	0.82	Marginal	93	125	FALSE
CCDS8220.1	Brain size	-0.293667	0.69	Marginal	93	125	FALSE
CCDS1412.1	Body mass	0.293333	0.68	Marginal	49	125	FALSE
CCDS14095.1	GI	0.29	0.74	Partial	9	125	FALSE
CCDS72780.1	GI	0.288333	0.733333	Partial	10	125	FALSE
CCDS32645.1	Body mass	0.288	0.726667	Partial	8	125	FALSE
CCDS8538.1	Body mass	0.286667	0.726667	Partial	9	125	FALSE
CCDS7866.1	Brain size	-0.284667	0.673333	Marginal	92	125	FALSE
CCDS5451.1	GI	0.284	0.73	Partial	11	125	FALSE
CCDS2644.1	Brain size	0.283	0.663333	Marginal	51	125	FALSE
CCDS41759.1	Body mass	-0.282333	0.723333	Partial	115	125	FALSE
CCDS33662.1	Body mass	0.281667	0.686667	Marginal	50	125	FALSE
CCDS45608.1	Body mass	0.280333	0.736667	Partial	10	125	FALSE
CCDS1412.1	Brain size	0.28	0.67	Marginal	52	125	FALSE
CCDS7866.1	Body mass	-0.278333	0.676667	Marginal	92	125	FALSE
CCDS5704.1	GI	-0.277667	0.686667	Marginal	96	125	FALSE
CCDS4187.1	Brain size	0.277333	0.74	Partial	19	125	FALSE
CCDS6310.1	Brain size	0.276667	0.73	Partial	20	125	FALSE
CCDS1491.1	GI	0.276333	0.696667	Marginal	48	125	FALSE
CCDS78053.1	GI	0.275333	0.696667	Marginal	49	125	FALSE
CCDS9996.1	Brain size	-0.274667	0.81	Marginal	91	125	FALSE
CCDS1791.1	Brain size	-0.274	0.733333	Partial	121	125	FALSE
CCDS10240.1	GI	-0.272	0.706667	Marginal	95	125	FALSE
CCDS3961.1	Brain size	0.269333	0.663333	Marginal	53	125	FALSE
CCDS53941.1	Brain size	0.269	0.736667	Partial	21	125	FALSE
CCDS2769.1	Brain size	-0.269	0.73	Partial	120	125	FALSE
CCDS9555.1	Body mass	-0.267667	0.68	Marginal	91	125	FALSE
CCDS5560.1	Body mass	-0.267667	0.72	Partial	114	125	FALSE
CCDS382.1	GI	0.267	0.746667	Marginal	50	125	FALSE
CCDS41923.1	Brain size	0.266667	0.743333	Partial	22	125	FALSE
CCDS12403.1	GI	0.265333	0.71	Partial	12	125	FALSE
CCDS2736.1	GI	-0.264333	0.83	Marginal	94	125	FALSE
CCDS1491.1	Body mass	0.262333	0.673333	Marginal	51	125	FALSE
CCDS2644.1	Body mass	0.261667	0.66	Marginal	52	125	FALSE
CCDS33056.1	GI	-0.260667	0.69	Marginal	93	125	FALSE
CCDS43866.1	Body mass	0.259	0.713333	Partial	11	125	FALSE
CCDS56011.1	Brain size	0.257	0.72	Partial	23	125	FALSE
CCDS56397.1	Body mass	0.256667	0.766667	Partial	12	125	FALSE
CCDS8886.1	Brain size	-0.256333	0.723333	Partial	119	125	FALSE
CCDS10274.1	Body mass	-0.255667	0.706667	Partial	113	125	FALSE
CCDS3961.1	GI	0.255667	0.68	Marginal	51	125	FALSE
CCDS2644.1	GI	0.254	0.67	Marginal	52	125	FALSE
CCDS32039.1	Brain size	-0.253	0.793333	Marginal	90	125	FALSE
CCDS82287.1	Body mass	-0.251667	0.746667	Marginal	90	125	FALSE
CCDS5901.1	GI	0.251667	0.7	Partial	13	125	FALSE
CCDS10029.1	GI	-0.248333	0.69	Partial	122	125	FALSE
CCDS1412.1	GI	0.247	0.67	Marginal	53	125	FALSE
CCDS11869.1	GI	0.244667	0.696667	Partial	14	125	FALSE
CCDS53682.1	Brain size	0.243	0.703333	Partial	24	125	FALSE
CCDS9396.1	Body mass	-0.242667	0.693333	Partial	112	125	FALSE
CCDS3731.1	Brain size	0.242667	0.65	Marginal	54	125	FALSE
CCDS54444.1	Brain size	-0.242	0.646667	Marginal	89	125	FALSE
CCDS43281.1	Brain size	0.241667	0.663333	Marginal	55	125	FALSE
CCDS9555.1	Brain size	-0.241667	0.66	Marginal	88	125	FALSE
CCDS54444.1	Body mass	-0.241333	0.653333	Marginal	89	125	FALSE
CCDS33662.1	GI	0.241333	0.686667	Marginal	54	125	FALSE
CCDS12092.1	Body mass	-0.241	0.78	Marginal	88	125	FALSE
CCDS7866.1	GI	-0.241	0.673333	Marginal	92	125	FALSE
CCDS31856.1	Body mass	0.240333	0.693333	Partial	13	125	FALSE
CCDS3961.1	Body mass	0.24	0.653333	Marginal	53	125	FALSE
CCDS43866.1	GI	0.239667	0.7	Partial	15	125	FALSE
CCDS32999.1	Body mass	-0.239	0.693333	Partial	111	125	FALSE
CCDS1450.1	Brain size	-0.237	0.71	Partial	118	125	FALSE
CCDS5421.1	Brain size	-0.235667	0.706667	Partial	117	125	FALSE
CCDS2596.1	Body mass	0.234	0.806667	Marginal	54	125	FALSE
CCDS10240.1	Body mass	-0.233667	0.696667	Partial	110	125	FALSE
CCDS7037.2	Brain size	-0.233333	0.7	Partial	116	125	FALSE
CCDS8099.1	Brain size	-0.232	0.64	Marginal	87	125	FALSE
CCDS11320.1	Brain size	-0.229333	0.686667	Partial	115	125	FALSE
CCDS3731.1	Body mass	0.228333	0.643333	Marginal	55	125	FALSE
CCDS10274.1	Brain size	-0.228	0.703333	Partial	114	125	FALSE
CCDS8538.1	Brain size	0.227	0.7	Partial	25	125	FALSE
CCDS12424.1	Brain size	-0.227	0.726667	Partial	113	125	FALSE
CCDS382.1	GI	0.227	0.74	Partial	16	125	FALSE
CCDS45815.1	Brain size	-0.226333	0.75	Partial	112	125	FALSE
CCDS5368.1	GI	0.225667	0.653333	Marginal	55	125	FALSE
CCDS55639.1	Body mass	0.225	0.693333	Partial	14	125	FALSE
CCDS9396.1	GI	-0.225	0.673333	Partial	121	125	FALSE
CCDS4231.1	GI	-0.224333	0.683333	Partial	120	125	FALSE
CCDS4334.1	Body mass	-0.221333	0.636667	Marginal	87	125	FALSE
CCDS9396.1	Brain size	-0.219	0.683333	Partial	111	125	FALSE
CCDS5368.1	Brain size	0.217	0.633333	Marginal	56	125	FALSE
CCDS5451.1	Brain size	0.217	0.693333	Partial	26	125	FALSE
CCDS4334.1	Brain size	-0.216667	0.626667	Marginal	86	125	FALSE
CCDS7795.1	Body mass	0.214667	0.67	Partial	15	125	FALSE
CCDS2128.1	Brain size	0.212	0.736667	Partial	27	125	FALSE
CCDS939.1	Brain size	0.211333	0.683333	Partial	28	125	FALSE
CCDS8099.1	Body mass	-0.210333	0.633333	Marginal	86	125	FALSE
CCDS9419.1	Body mass	0.207667	0.673333	Partial	16	125	FALSE
CCDS8099.1	GI	-0.206667	0.65	Marginal	91	125	FALSE
CCDS4119.1	Brain size	-0.206333	0.736667	Partial	110	125	FALSE
CCDS45229.1	Brain size	0.205667	0.683333	Partial	29	125	FALSE
CCDS47296.1	Brain size	0.203333	0.626667	Marginal	57	125	FALSE
CCDS9249.1	Brain size	0.203333	0.67	Partial	30	125	FALSE
CCDS32645.1	GI	0.202	0.663333	Partial	17	125	FALSE
CCDS12432.1	GI	0.201	0.663333	Partial	18	125	FALSE
CCDS53815.1	Brain size	-0.199667	0.666667	Partial	109	125	FALSE
CCDS41289.1	Body mass	0.199	0.66	Partial	17	125	TRUE
CCDS47296.1	GI	0.198667	0.636667	Marginal	56	125	FALSE
CCDS8220.1	GI	-0.196667	0.66	Marginal	90	125	FALSE
CCDS288.1	GI	0.195667	0.656667	Partial	19	125	FALSE
CCDS303.1	Body mass	0.195	0.623333	Marginal	56	125	FALSE
CCDS30668.1	Brain size	0.193667	0.67	Partial	31	125	FALSE
CCDS30668.1	GI	0.193333	0.66	Partial	20	125	FALSE
CCDS382.1	Body mass	0.192333	0.636667	Marginal	57	125	FALSE
CCDS12092.1	Brain size	-0.192333	0.703333	Partial	108	125	FALSE
CCDS55939.1	GI	0.192333	0.653333	Marginal	57	125	FALSE
CCDS54444.1	GI	-0.192333	0.636667	Marginal	89	125	FALSE
CCDS6530.1	Body mass	0.191667	0.653333	Partial	18	125	FALSE
CCDS10488.1	Brain size	-0.191	0.673333	Partial	107	125	FALSE
CCDS4334.1	GI	-0.189667	0.626667	Marginal	88	125	FALSE
CCDS7795.1	GI	0.189	0.653333	Partial	21	125	FALSE
CCDS885.1	Body mass	0.188	0.606667	Marginal	58	125	FALSE
CCDS9249.1	GI	0.187667	0.65	Partial	22	125	FALSE
CCDS4231.1	Body mass	-0.187333	0.66	Partial	109	125	FALSE
CCDS5186.1	Brain size	0.187333	0.66	Partial	32	125	FALSE
CCDS9491.1	Brain size	0.187	0.62	Marginal	58	125	FALSE
CCDS34051.1	Body mass	0.186667	0.653333	Partial	19	125	FALSE
CCDS8220.1	Body mass	-0.185667	0.653333	Partial	108	125	FALSE
CCDS7861.1	Brain size	0.185333	0.656667	Partial	33	125	FALSE
CCDS1791.1	Body mass	-0.184333	0.65	Partial	107	125	FALSE
CCDS5368.1	Body mass	0.184	0.62	Marginal	59	125	FALSE
CCDS53941.1	GI	0.184	0.65	Partial	23	125	FALSE
CCDS885.1	Brain size	0.183667	0.603333	Marginal	59	125	FALSE
CCDS3458.1	Body mass	0.183333	0.65	Partial	20	125	FALSE
CCDS12558.1	Brain size	-0.183	0.653333	Partial	106	125	FALSE
CCDS31856.1	GI	0.183	0.65	Partial	24	125	FALSE
CCDS303.1	Brain size	0.182	0.61	Marginal	60	125	FALSE
CCDS75237.1	Brain size	0.180333	0.693333	Partial	34	125	FALSE
CCDS47296.1	Body mass	0.18	0.616667	Marginal	60	125	FALSE
CCDS9463.1	GI	0.18	0.646667	Partial	25	125	FALSE
CCDS8467.1	Brain size	0.179	0.663333	Partial	35	125	FALSE
CCDS9419.1	Brain size	0.178667	0.666667	Partial	36	125	FALSE
CCDS33463.1	Brain size	-0.178333	0.663333	Partial	105	125	FALSE
CCDS1488.1	GI	0.177333	0.646667	Partial	26	125	FALSE
CCDS382.1	Brain size	0.176333	0.616667	Marginal	61	125	FALSE
CCDS3012.1	Body mass	0.176	0.643333	Partial	21	125	FALSE
CCDS78053.1	Brain size	0.174333	0.65	Partial	37	125	FALSE
CCDS10652.1	Body mass	0.173333	0.64	Partial	22	125	FALSE
CCDS3731.1	GI	0.172333	0.64	Marginal	58	125	FALSE
CCDS9555.1	GI	-0.171333	0.63	Marginal	87	125	FALSE
CCDS10488.1	GI	-0.171333	0.66	Partial	119	125	FALSE
CCDS288.1	Brain size	0.171	0.65	Partial	38	125	FALSE
CCDS1302.1	GI	0.170333	0.643333	Partial	27	125	FALSE
CCDS6115.1	Brain size	0.17	0.646667	Partial	39	125	FALSE
CCDS3458.1	Brain size	0.169667	0.643333	Partial	40	125	FALSE
CCDS34301.1	Brain size	0.168667	0.596667	Marginal	62	125	FALSE
CCDS30668.1	Body mass	0.168333	0.64	Partial	23	125	FALSE
CCDS41285.1	Brain size	0.167333	0.646667	Partial	41	125	FALSE
CCDS13192.1	GI	-0.167333	0.646667	Partial	118	125	FALSE
CCDS2596.1	Body mass	-0.167	0.703333	Partial	106	125	FALSE
CCDS9555.1	Body mass	-0.165667	0.64	Partial	105	125	FALSE
CCDS4179.1	Brain size	-0.165333	0.643333	Partial	104	125	FALSE
CCDS10029.1	GI	-0.164667	0.606667	Marginal	86	125	FALSE
CCDS4119.1	Body mass	0.164	0.693333	Partial	24	125	FALSE
CCDS303.1	GI	0.164	0.616667	Marginal	59	125	FALSE
CCDS6115.1	GI	0.163667	0.626667	Partial	28	125	FALSE
CCDS32039.1	Body mass	-0.161667	0.673333	Partial	104	125	FALSE
CCDS86085.1	GI	0.161333	0.64	Partial	29	125	FALSE
CCDS13139.1	Brain size	0.161	0.65	Partial	42	125	FALSE
CCDS885.1	GI	0.160333	0.603333	Marginal	60	125	FALSE
CCDS32037.1	Brain size	0.159667	0.64	Partial	43	125	FALSE
CCDS13471.1	Brain size	-0.159	0.643333	Partial	103	125	FALSE
CCDS72780.1	Brain size	0.157	0.643333	Partial	44	125	FALSE
CCDS5973.1	Brain size	0.156667	0.606667	Marginal	63	125	FALSE
CCDS32039.1	GI	-0.156667	0.706667	Marginal	85	125	FALSE
CCDS11587.1	Brain size	-0.156	0.633333	Partial	101	125	FALSE
CCDS4095.1	Brain size	-0.156	0.63	Partial	102	125	FALSE
CCDS3012.1	Body mass	0.155667	0.596667	Marginal	61	125	FALSE
CCDS8886.1	Body mass	-0.152667	0.623333	Partial	103	125	FALSE
CCDS41285.1	Body mass	0.152333	0.623333	Partial	25	125	FALSE
CCDS32545.1	Brain size	0.150333	0.59	Marginal	64	125	FALSE
CCDS82287.1	Body mass	0.150333	0.67	Partial	26	125	FALSE
CCDS10847.1	Body mass	0.15	0.703333	Marginal	62	125	FALSE
CCDS9491.1	Body mass	0.147667	0.603333	Marginal	63	125	FALSE
CCDS4337.1	Brain size	0.147333	0.66	Partial	45	125	FALSE
CCDS382.1	Body mass	0.146333	0.643333	Partial	27	125	FALSE
CCDS2736.1	Brain size	-0.145667	0.65	Partial	100	125	FALSE
CCDS32545.1	GI	0.145333	0.6	Marginal	61	125	FALSE
CCDS2644.1	Brain size	0.145	0.62	Partial	46	125	FALSE
CCDS45815.1	Brain size	-0.144667	0.7	Marginal	85	125	FALSE
CCDS12432.1	Brain size	0.143667	0.62	Partial	47	125	FALSE
CCDS34301.1	Body mass	0.143333	0.59	Marginal	64	125	FALSE
CCDS1412.1	GI	0.143333	0.613333	Partial	30	125	FALSE
CCDS82287.1	Brain size	-0.142333	0.656667	Partial	99	125	FALSE
CCDS7861.1	GI	0.141667	0.613333	Partial	31	125	FALSE
CCDS2769.1	GI	-0.140333	0.616667	Partial	117	125	FALSE
CCDS13139.1	GI	0.14	0.603333	Marginal	62	125	FALSE
CCDS5368.1	GI	0.138667	0.613333	Partial	32	125	FALSE
CCDS32037.1	GI	0.138333	0.616667	Partial	33	125	FALSE
CCDS3731.1	Brain size	0.138	0.62	Partial	48	125	FALSE
CCDS34301.1	GI	0.137667	0.596667	Marginal	63	125	FALSE
CCDS12432.1	Body mass	0.136333	0.613333	Partial	28	125	FALSE
CCDS55939.1	Body mass	0.136333	0.613333	Partial	29	125	FALSE
CCDS2198.1	GI	-0.135333	0.606667	Partial	116	125	FALSE
CCDS33793.1	Body mass	0.135	0.616667	Marginal	65	125	FALSE
CCDS1412.1	Body mass	0.134333	0.606667	Partial	30	125	FALSE
CCDS4095.1	Body mass	-0.132667	0.606667	Partial	102	125	FALSE
CCDS2227.1	GI	-0.132667	0.586667	Marginal	84	125	FALSE
CCDS2227.1	Brain size	-0.132333	0.576667	Marginal	84	125	FALSE
CCDS45815.1	GI	-0.132	0.696667	Marginal	83	125	FALSE
CCDS32999.1	Brain size	-0.130667	0.603333	Partial	98	125	FALSE
CCDS9491.1	GI	0.129667	0.603333	Marginal	64	125	FALSE
CCDS2198.1	Brain size	-0.128	0.606667	Partial	97	125	FALSE
CCDS32999.1	GI	-0.127667	0.603333	Partial	115	125	FALSE
CCDS5973.1	Body mass	0.127667	0.593333	Marginal	66	125	FALSE
CCDS33056.1	Brain size	-0.126667	0.613333	Partial	96	125	FALSE
CCDS33793.1	Body mass	0.126333	0.616667	Partial	31	125	FALSE
CCDS6007.1	Brain size	0.126333	0.576667	Marginal	65	125	FALSE
CCDS2596.1	GI	0.126	0.663333	Partial	34	125	FALSE
CCDS13139.1	Brain size	0.125667	0.58	Marginal	66	125	FALSE
CCDS5205.1	GI	-0.125333	0.646667	Partial	114	125	FALSE
CCDS2227.1	Body mass	-0.125	0.576667	Marginal	85	125	FALSE
CCDS7866.1	Body mass	-0.124667	0.603333	Partial	101	125	FALSE
CCDS45229.1	GI	0.122667	0.6	Partial	35	125	FALSE
CCDS32039.1	GI	0.122333	0.653333	Partial	36	125	FALSE
CCDS4231.1	Brain size	-0.121333	0.6	Partial	95	125	FALSE
CCDS64082.1	GI	-0.121	0.596667	Partial	113	125	FALSE
CCDS5973.1	GI	0.120667	0.596667	Marginal	65	125	FALSE
CCDS5704.1	Brain size	-0.120333	0.606667	Partial	94	125	FALSE
CCDS55639.1	Brain size	0.119667	0.6	Partial	49	125	FALSE
CCDS55939.1	Brain size	0.118	0.61	Partial	50	125	FALSE
CCDS9463.1	Brain size	0.117667	0.6	Partial	51	125	FALSE
CCDS32545.1	Body mass	0.117333	0.58	Marginal	67	125	FALSE
CCDS4337.1	Brain size	-0.117333	0.653333	Marginal	83	125	FALSE
CCDS1491.1	Brain size	0.116	0.61	Partial	52	125	FALSE
CCDS3012.1	Brain size	0.115333	0.576667	Marginal	67	125	FALSE
CCDS8099.1	Brain size	-0.115	0.6	Partial	93	125	FALSE
CCDS6007.1	GI	0.115	0.58	Marginal	66	125	FALSE
CCDS3961.1	Brain size	0.114	0.603333	Partial	53	125	FALSE
CCDS53815.1	Body mass	-0.113667	0.59	Partial	100	125	FALSE
CCDS11587.1	GI	-0.113	0.59	Partial	112	125	FALSE
CCDS43281.1	GI	0.112333	0.58	Marginal	67	125	FALSE
CCDS4095.1	GI	-0.111333	0.59	Partial	111	125	FALSE
CCDS13139.1	Body mass	-0.111	0.593333	Partial	99	125	FALSE
CCDS41759.1	Brain size	-0.11	0.593333	Partial	92	125	FALSE
CCDS9996.1	GI	-0.109667	0.61	Partial	110	125	FALSE
CCDS47296.1	GI	0.109333	0.593333	Partial	37	125	FALSE
CCDS33662.1	Brain size	0.109	0.6	Partial	54	125	FALSE
CCDS3961.1	GI	0.109	0.59	Partial	38	125	FALSE
CCDS10847.1	Brain size	0.108667	0.643333	Marginal	68	125	FALSE
CCDS2128.1	Brain size	0.108667	0.643333	Marginal	69	125	FALSE
CCDS303.1	Body mass	0.107333	0.59	Partial	32	125	FALSE
CCDS4334.1	Body mass	-0.107333	0.586667	Partial	98	125	FALSE
CCDS9518.1	GI	-0.107333	0.623333	Partial	109	125	FALSE
CCDS8220.1	Brain size	-0.107	0.6	Partial	91	125	FALSE
CCDS10652.1	GI	0.107	0.586667	Partial	39	125	FALSE
CCDS7866.1	Brain size	-0.106667	0.59	Partial	90	125	FALSE
CCDS9419.1	GI	0.106	0.586667	Partial	40	125	FALSE
CCDS4119.1	Brain size	-0.105	0.586667	Marginal	82	125	FALSE
CCDS6436.1	Brain size	0.104667	0.596667	Partial	55	125	FALSE
CCDS86085.1	Brain size	-0.104	0.603333	Partial	89	125	FALSE
CCDS45229.1	Body mass	0.103333	0.583333	Partial	33	125	FALSE
CCDS7400.1	Body mass	-0.102333	0.573333	Marginal	84	125	FALSE
CCDS4179.1	Body mass	-0.102333	0.583333	Partial	97	125	FALSE
CCDS4119.1	GI	-0.101667	0.596667	Marginal	82	125	FALSE
CCDS13471.1	GI	-0.101667	0.6	Partial	108	125	FALSE
CCDS9491.1	Brain size	0.0996667	0.59	Partial	56	125	FALSE
CCDS54444.1	Brain size	-0.0986667	0.583333	Partial	88	125	FALSE
CCDS7400.1	Brain size	-0.0983333	0.566667	Marginal	81	125	FALSE
CCDS45815.1	Body mass	-0.098	0.633333	Marginal	83	125	FALSE
CCDS54444.1	Body mass	-0.098	0.58	Partial	96	125	FALSE
CCDS2128.1	GI	0.097	0.643333	Marginal	68	125	FALSE
CCDS41980.1	Brain size	-0.0963333	0.556667	Marginal	80	125	FALSE
CCDS2644.1	GI	0.096	0.576667	Partial	41	125	FALSE
CCDS4179.1	GI	-0.0956667	0.576667	Partial	107	125	FALSE
CCDS4187.1	Body mass	0.095	0.58	Partial	34	125	FALSE
CCDS10735.1	Brain size	-0.0946667	0.556667	Marginal	79	125	FALSE
CCDS1491.1	GI	0.0946667	0.576667	Partial	42	125	FALSE
CCDS5368.1	Brain size	0.0936667	0.586667	Partial	57	125	FALSE
CCDS55939.1	GI	-0.0933333	0.58	Partial	106	125	FALSE
CCDS13192.1	Brain size	-0.092	0.583333	Partial	87	125	FALSE
CCDS7037.2	GI	-0.091	0.57	Partial	105	125	FALSE
CCDS1204.1	GI	0.0906667	0.56	Marginal	69	125	FALSE
CCDS12424.1	Body mass	-0.0906667	0.59	Partial	94	125	FALSE
CCDS2198.1	Body mass	-0.0906667	0.57	Partial	95	125	FALSE
CCDS10735.1	GI	-0.0886667	0.56	Marginal	81	125	FALSE
CCDS53941.1	Body mass	0.0883333	0.573333	Partial	35	125	FALSE
CCDS9463.1	Body mass	0.0883333	0.573333	Partial	36	125	FALSE
CCDS1204.1	Body mass	0.088	0.55	Marginal	68	125	FALSE
CCDS2128.1	Body mass	-0.088	0.613333	Marginal	82	125	FALSE
CCDS4337.1	GI	-0.088	0.616667	Marginal	80	125	FALSE
CCDS32039.1	Brain size	-0.087	0.606667	Partial	86	125	FALSE
CCDS9996.1	Body mass	0.0866667	0.61	Marginal	69	125	FALSE
CCDS11320.1	Body mass	-0.0866667	0.57	Partial	93	125	FALSE
CCDS5186.1	Body mass	0.0863333	0.57	Partial	37	125	FALSE
CCDS35185.1	GI	0.0856667	0.553333	Marginal	70	125	FALSE
CCDS41980.1	GI	-0.0856667	0.556667	Marginal	79	125	FALSE
CCDS12424.1	Body mass	-0.085	0.626667	Marginal	81	125	FALSE
CCDS10735.1	Body mass	-0.0843333	0.556667	Marginal	80	125	FALSE
CCDS33793.1	Brain size	0.0843333	0.576667	Marginal	70	125	FALSE
CCDS3458.1	GI	0.0843333	0.566667	Partial	43	125	FALSE
CCDS41980.1	Body mass	-0.0836667	0.553333	Marginal	79	125	FALSE
CCDS35185.1	Brain size	0.0833333	0.543333	Marginal	71	125	FALSE
CCDS43281.1	GI	-0.083	0.573333	Partial	104	125	FALSE
CCDS86085.1	Body mass	-0.082	0.553333	Marginal	78	125	FALSE
CCDS1204.1	Brain size	0.082	0.55	Marginal	72	125	FALSE
CCDS10847.1	Body mass	0.0816667	0.61	Partial	38	125	FALSE
CCDS2227.1	GI	-0.0816667	0.563333	Partial	103	125	FALSE
CCDS6007.1	Body mass	0.0813333	0.553333	Marginal	70	125	FALSE
CCDS5704.1	Body mass	-0.0806667	0.566667	Partial	92	125	FALSE
CCDS9555.1	Brain size	-0.0793333	0.57	Partial	85	125	FALSE
CCDS3012.1	GI	-0.0793333	0.566667	Partial	102	125	FALSE
CCDS86085.1	Brain size	-0.0773333	0.55	Marginal	78	125	FALSE
CCDS11976.1	Body mass	0.077	0.556667	Partial	39	125	FALSE
CCDS885.1	Body mass	0.077	0.563333	Partial	40	125	FALSE
CCDS11587.1	Body mass	-0.077	0.56	Partial	91	125	FALSE
CCDS47319.1	GI	-0.077	0.603333	Partial	101	125	FALSE
CCDS78053.1	Body mass	0.0766667	0.563333	Partial	41	125	FALSE
CCDS33056.1	Body mass	-0.0766667	0.563333	Partial	90	125	FALSE
CCDS7866.1	GI	-0.0766667	0.563333	Partial	100	125	FALSE
CCDS53815.1	GI	-0.0763333	0.56	Partial	99	125	FALSE
CCDS6188.1	Brain size	-0.075	0.553333	Partial	84	125	FALSE
CCDS7400.1	GI	-0.0746667	0.556667	Marginal	78	125	FALSE
CCDS1450.1	Body mass	-0.0743333	0.56	Partial	89	125	FALSE
CCDS5451.1	Body mass	-0.074	0.566667	Partial	88	125	FALSE
CCDS11320.1	GI	-0.074	0.56	Partial	98	125	FALSE
CCDS2644.1	Body mass	0.0723333	0.553333	Partial	42	125	FALSE
CCDS1412.1	Brain size	0.0723333	0.56	Partial	58	125	FALSE
CCDS33463.1	GI	-0.0716667	0.56	Partial	97	125	FALSE
CCDS6436.1	GI	0.071	0.56	Partial	44	125	FALSE
CCDS6115.1	Body mass	0.0703333	0.556667	Partial	43	125	FALSE
CCDS4334.1	Brain size	-0.0703333	0.563333	Partial	83	125	FALSE
CCDS303.1	GI	0.069	0.553333	Partial	45	125	FALSE
CCDS1204.1	GI	0.0686667	0.553333	Partial	46	125	FALSE
CCDS5421.1	Body mass	-0.0676667	0.556667	Partial	87	125	FALSE
CCDS34301.1	Brain size	0.0673333	0.56	Partial	59	125	FALSE
CCDS13139.1	Body mass	0.067	0.543333	Marginal	71	125	FALSE
CCDS47296.1	Brain size	0.0663333	0.556667	Partial	60	125	FALSE
CCDS8220.1	GI	0.066	0.556667	Partial	47	125	FALSE
CCDS9358.1	Body mass	0.0653333	0.55	Partial	44	125	FALSE
CCDS7861.1	Body mass	0.0643333	0.55	Partial	45	125	FALSE
CCDS5973.1	Brain size	0.0643333	0.556667	Partial	61	125	FALSE
CCDS1302.1	Body mass	-0.0636667	0.566667	Partial	86	125	FALSE
CCDS10240.1	GI	-0.0633333	0.553333	Partial	96	125	FALSE
CCDS32545.1	GI	0.063	0.55	Partial	48	125	FALSE
CCDS35185.1	Body mass	-0.0626667	0.55	Partial	85	125	FALSE
CCDS1791.1	GI	-0.0623333	0.55	Partial	95	125	FALSE
CCDS8099.1	GI	-0.0613333	0.553333	Partial	94	125	FALSE
CCDS7400.1	Brain size	-0.061	0.556667	Partial	82	125	FALSE
CCDS9358.1	Body mass	0.0606667	0.536667	Marginal	72	125	FALSE
CCDS75237.1	GI	-0.0606667	0.56	Partial	93	125	FALSE
CCDS8467.1	GI	0.0593333	0.546667	Partial	49	125	FALSE
CCDS10847.1	GI	0.0586667	0.583333	Marginal	71	125	FALSE
CCDS4337.1	GI	-0.0586667	0.58	Partial	92	125	FALSE
CCDS56397.1	Brain size	-0.0583333	0.583333	Marginal	77	125	FALSE
CCDS10847.1	Brain size	0.0583333	0.563333	Partial	62	125	FALSE
CCDS45608.1	Brain size	0.058	0.546667	Partial	63	125	FALSE
CCDS303.1	Brain size	0.0576667	0.553333	Partial	64	125	FALSE
CCDS78053.1	GI	0.0576667	0.55	Partial	50	125	FALSE
CCDS14095.1	Body mass	-0.057	0.553333	Partial	83	125	FALSE
CCDS939.1	Body mass	-0.057	0.543333	Partial	84	125	FALSE
CCDS9518.1	Body mass	0.0563333	0.573333	Partial	46	125	FALSE
CCDS2227.1	Brain size	-0.0563333	0.543333	Partial	81	125	FALSE
CCDS4334.1	GI	-0.056	0.54	Partial	91	125	FALSE
CCDS1204.1	Body mass	0.0556667	0.543333	Partial	47	125	FALSE
CCDS41923.1	Body mass	-0.0556667	0.553333	Partial	82	125	FALSE
CCDS6188.1	GI	0.0543333	0.556667	Partial	51	125	FALSE
CCDS3731.1	Body mass	0.0533333	0.54	Partial	48	125	FALSE
CCDS86085.1	Body mass	-0.0526667	0.55	Partial	81	125	FALSE
CCDS9358.1	Brain size	0.052	0.543333	Partial	65	125	FALSE
CCDS35185.1	Body mass	0.0516667	0.53	Marginal	73	125	FALSE
CCDS33662.1	Body mass	0.0506667	0.54	Partial	49	125	FALSE
CCDS33793.1	Brain size	0.0506667	0.55	Partial	66	125	FALSE
CCDS10029.1	Body mass	0.0503333	0.543333	Partial	50	125	FALSE
CCDS8538.1	GI	-0.0503333	0.546667	Partial	90	125	FALSE
CCDS4119.1	Body mass	-0.05	0.53	Marginal	77	125	FALSE
CCDS3012.1	GI	0.05	0.543333	Marginal	72	125	FALSE
CCDS13139.1	GI	0.05	0.543333	Partial	52	125	FALSE
CCDS47319.1	Body mass	-0.0496667	0.57	Partial	80	125	FALSE
CCDS32545.1	Brain size	0.0493333	0.543333	Partial	67	125	FALSE
CCDS10240.1	Brain size	-0.0493333	0.536667	Partial	80	125	FALSE
CCDS10735.1	Brain size	-0.0483333	0.54	Partial	79	125	FALSE
CCDS3961.1	Body mass	0.0473333	0.536667	Partial	51	125	FALSE
CCDS1450.1	GI	-0.047	0.54	Partial	89	125	FALSE
CCDS32037.1	Body mass	0.046	0.536667	Partial	52	125	FALSE
CCDS6310.1	GI	-0.044	0.553333	Partial	88	125	FALSE
CCDS7037.2	Body mass	0.043	0.533333	Partial	53	125	FALSE
CCDS33793.1	GI	-0.043	0.54	Partial	87	125	FALSE
CCDS10029.1	Brain size	-0.0426667	0.52	Marginal	76	125	FALSE
CCDS41980.1	Brain size	-0.041	0.533333	Partial	78	125	FALSE
CCDS5186.1	GI	0.0406667	0.533333	Partial	53	125	FALSE
CCDS10735.1	GI	-0.039	0.53	Partial	86	125	FALSE
CCDS1491.1	Body mass	0.0386667	0.53	Partial	54	125	FALSE
CCDS5901.1	Body mass	0.0386667	0.53	Partial	55	125	FALSE
CCDS9249.1	Body mass	0.0383333	0.53	Partial	56	125	FALSE
CCDS885.1	GI	0.038	0.53	Partial	54	125	FALSE
CCDS4187.1	GI	-0.0376667	0.533333	Partial	85	125	FALSE
CCDS2227.1	Body mass	-0.0366667	0.53	Partial	79	125	FALSE
CCDS35185.1	Brain size	0.036	0.53	Partial	68	125	FALSE
CCDS9358.1	Brain size	0.036	0.523333	Marginal	73	125	FALSE
CCDS56397.1	Body mass	0.035	0.53	Marginal	74	125	FALSE
CCDS5973.1	Body mass	0.0343333	0.526667	Partial	57	125	FALSE
CCDS6559.1	Body mass	-0.033	0.523333	Marginal	76	125	FALSE
CCDS6559.1	Body mass	-0.0323333	0.526667	Partial	78	125	FALSE
CCDS33662.1	GI	0.0316667	0.53	Partial	55	125	FALSE
CCDS33056.1	GI	0.0313333	0.526667	Partial	56	125	FALSE
CCDS56397.1	GI	-0.03	0.546667	Marginal	77	125	FALSE
CCDS2128.1	GI	0.03	0.543333	Partial	57	125	FALSE
CCDS35185.1	GI	0.03	0.526667	Partial	58	125	FALSE
CCDS47296.1	Body mass	0.0296667	0.523333	Partial	58	125	FALSE
CCDS8099.1	Body mass	-0.029	0.523333	Partial	77	125	FALSE
CCDS885.1	Brain size	0.029	0.523333	Partial	69	125	FALSE
CCDS7400.1	Body mass	-0.0283333	0.523333	Partial	76	125	FALSE
CCDS288.1	Body mass	0.028	0.52	Partial	59	125	FALSE
CCDS6007.1	Brain size	0.0276667	0.526667	Partial	70	125	FALSE
CCDS10274.1	GI	-0.0276667	0.52	Partial	84	125	FALSE
CCDS6559.1	Brain size	-0.026	0.516667	Marginal	75	125	FALSE
CCDS4119.1	GI	0.025	0.536667	Partial	59	125	FALSE
CCDS45815.1	Body mass	-0.0246667	0.526667	Partial	75	125	FALSE
CCDS11976.1	GI	0.0246667	0.513333	Partial	60	125	FALSE
CCDS5704.1	GI	0.0243333	0.52	Partial	61	125	FALSE
CCDS41285.1	GI	0.0236667	0.52	Partial	62	125	FALSE
CCDS939.1	GI	0.0236667	0.516667	Partial	63	125	FALSE
CCDS6436.1	Body mass	-0.0233333	0.523333	Partial	74	125	FALSE
CCDS1204.1	Brain size	0.0216667	0.52	Partial	71	125	FALSE
CCDS33793.1	GI	0.0213333	0.526667	Marginal	73	125	FALSE
CCDS5560.1	GI	0.0206667	0.536667	Partial	64	125	FALSE
CCDS13471.1	Body mass	0.0203333	0.536667	Partial	60	125	FALSE
CCDS32545.1	Body mass	-0.0203333	0.52	Partial	72	125	FALSE
CCDS8467.1	Body mass	-0.0203333	0.516667	Partial	73	125	FALSE
CCDS56011.1	Body mass	-0.0196667	0.526667	Partial	71	125	FALSE
CCDS9358.1	GI	0.018	0.52	Marginal	74	125	FALSE
CCDS10735.1	Body mass	-0.018	0.51	Partial	70	125	FALSE
CCDS41980.1	GI	-0.018	0.516667	Partial	83	125	FALSE
CCDS6559.1	GI	0.0173333	0.513333	Partial	65	125	FALSE
CCDS10029.1	Brain size	-0.0166667	0.51	Partial	77	125	FALSE
CCDS2596.1	Brain size	-0.0156667	0.51	Partial	76	125	FALSE
CCDS12403.1	Body mass	-0.0153333	0.516667	Partial	69	125	FALSE
CCDS8886.1	GI	-0.015	0.51	Partial	82	125	FALSE
CCDS12424.1	Brain size	0.015	0.473333	Marginal	74	125	FALSE
CCDS6007.1	GI	0.015	0.51	Partial	66	125	FALSE
CCDS10847.1	GI	0.0146667	0.51	Partial	67	125	FALSE
CCDS43281.1	Brain size	0.0136667	0.506667	Partial	72	125	FALSE
CCDS41759.1	GI	0.013	0.513333	Partial	68	125	FALSE
CCDS6007.1	Body mass	-0.0123333	0.516667	Partial	68	125	FALSE
CCDS6559.1	GI	-0.012	0.51	Marginal	76	125	FALSE
CCDS54444.1	GI	-0.0116667	0.51	Partial	81	125	FALSE
CCDS382.1	Brain size	-0.0116667	0.526667	Partial	75	125	FALSE
CCDS9555.1	GI	0.011	0.513333	Partial	69	125	FALSE
CCDS9358.1	GI	-0.0103333	0.506667	Partial	80	125	FALSE
CCDS5368.1	Body mass	0.01	0.503333	Partial	61	125	FALSE
CCDS56397.1	GI	0.00966667	0.516667	Partial	70	125	FALSE
CCDS7400.1	GI	0.00966667	0.51	Partial	71	125	FALSE
CCDS45815.1	GI	0.009	0.513333	Partial	72	125	FALSE
CCDS41980.1	Body mass	-0.009	0.51	Partial	67	125	FALSE
CCDS6559.1	Brain size	-0.008	0.506667	Partial	74	125	FALSE
CCDS3731.1	GI	-0.00766667	0.51	Partial	79	125	FALSE
CCDS5421.1	GI	-0.00766667	0.503333	Partial	78	125	FALSE
CCDS33463.1	Body mass	-0.00733333	0.506667	Partial	66	125	FALSE
CCDS9491.1	GI	-0.007	0.506667	Partial	77	125	FALSE
CCDS3012.1	Brain size	-0.00466667	0.506667	Partial	73	125	FALSE
CCDS41923.1	GI	0.00466667	0.5	Partial	73	125	FALSE
CCDS86085.1	GI	0.00466667	0.506667	Marginal	75	125	FALSE
CCDS5205.1	Body mass	-0.00433333	0.54	Partial	65	125	FALSE
CCDS5973.1	GI	0.004	0.503333	Partial	74	125	FALSE
CCDS34301.1	GI	-0.00333333	0.506667	Partial	76	125	FALSE
CCDS9491.1	Body mass	0.00233333	0.5	Partial	62	125	FALSE
CCDS34301.1	Body mass	-0.00233333	0.503333	Partial	64	125	FALSE
CCDS72780.1	Body mass	-0.000333333	0.506667	Partial	63	125	FALSE
CCDS34051.1	GI	0.000333333	0.5	Partial	75	125	FALSE
CCDS10029.1	Body mass	0.000333333	0.516667	Marginal	75	125	FALSE
