# Supplementary material for: Regulatory and coding sequences of TRNP1 co-evolve with brain size and cortical folding in mammals
Source: eLife. 2023 Mar 22;12:e83593. doi: 10.7554/eLife.83593 (PMC10032658; doi:10.7554/eLife.83593)
Supplement: Supplementary file 2. [file elife-83593-supp2.xlsx]

## Sheet: Table Legends
Table	Legend
2a	Model selection results between logistic regression models that predict the proportion of proliferating mouse NSCs in the presence of TRNP1 orthologues or GFP control (LRT). n=donor mouse (batch). Proliferation is best predicted by the presence of TRNP1 together with the donor mouse to correct for the batch
2b	The induced NSC proliferation rates by the different TRNP1 orthologues (according to model 2 from Table 2a)
2c	Pairwise proliferation rate comparison between the TRNP1 orthologues of interest (Tukey test)

## Sheet: 2a
Model	Resid. Df	Resid. Dev	Df	Deviance	Pr(>Chi)	Test
0: prolif(%) ~ 1	56	1312.8				TRNP1 vs. ctrl
1: prolif(%) ~ TRNP1	55	1058	1	254.8	2.3e-57	TRNP1 vs. ctrl
2: prolif(%) ~ TRNP1+n	44	209.8	11	848.2	8.4e-175	TRNP1 vs. ctrl
0: prolif(%) ~ 1	44	867.96				TRNP1 ortologues
1: prolif(%) ~ orthologue	40	790.69	4	77.27	6.6e-16	TRNP1 ortologues
2: prolif(%) ~ orthologue+n	29	108.85	11	681.85	4.2e-139	TRNP1 ortologues

## Sheet: 2b
Species	Proliferation rate	Std. Error
macaque	0.46	0.031
galago	0.48	0.031
mouse	0.51	0.026
human	0.55	0.025
dolphin	0.62	0.03

## Sheet: 2c
Comparison	Estimate	Std. Error	z value	Pr(>| z |)
human - mouse	0.15	0.069	2.210	0.0937
dolphin - human	0.27	0.091	2.928	0.0130
human - macaque	0.37	0.088	4.281	0.0001
human - galago	0.29	0.087	3.359	0.0032
