# Supplementary material for: Regulatory and coding sequences of TRNP1 co-evolve with brain size and cortical folding in mammals
Source: eLife. 2023 Mar 22;12:e83593. doi: 10.7554/eLife.83593 (PMC10032658; doi:10.7554/eLife.83593)
Supplement: Supplementary file 3. — TRNP1 DNase hypersensitive sites (3a), phylogenetic generalized least squares (PGLS) model selections using likelihood ratio test for all seven CREs and the whole phylogeny (3b) as well as only the intron CRE in Old World monkeys and great apes (3c) and enriched gene ontologies based on the transcription factors (TFs) with binding site enrichment in the intron CRE (3d). [file elife-83593-supp3.xlsx]

## Sheet: Table Legends
Table	Legend
3a	TRNP1 DNase hypersensitive sites in Human and Mouse
3b	PGLS model selection using LRT to test whether CRE activity of the 7 TRNP1 regulatory regions is predictive for either brain size or gyrification (GI) across species. The reduced model contains intercept as the only predictor
3c	PGLS model selection using LRT to test whether the association between GI and intron CRE activity on the Old World monkey and great ape branch is consistent across three independent cell lines. The reduced model contains intercept as the only predictor
3d	Enriched Gene Ontology Terms (Fisher's p-value <0.05) of the 22 TFs with binding site enrichment on the intron CRE sequences from the 10 catarrhine species. Background: all expressed TFs included in the motif binding enrichment analysis (392)

## Sheet: 3a
	Chromosome	Start	End	ID	Species
1	chr1	27293479	27293766	upstream1	Human
2	chr1	27310581	27310877	upstream2	Human
3	chr1	27318087	27318439	upstream3	Human
4	chr1	27319449	27321900	promexon1	Human
5	chr1	27323922	27324667	intron	Human
6	chr1	27327174	27327461	exon2	Human
7	chr1	27328171	27328804	downstream	Human
8	chr4	133494338	133494835	intron	Mouse
9	chr4	133495742	133496109	unique1	Mouse
10	chr4	133497135	133498824	promexon1	Mouse
11	chr4	133504292	133504667	unique2	Mouse
12	chr4	133504895	133505292	unique3	Mouse
13	chr4	133508796	133509525	upstream3	Mouse
14	chr4	133511090	133511417	upstream2	Mouse
15	chr4	133512990	133513416	upstream1	Mouse

## Sheet: 3b
Model	Value	Std.Error	df	L.Ratio	LRT p-value
log2(brain size) ~ log2(upstream1)	0.01	0.152	1	0.01	0.929
log2(brain size) ~ log2(upstream2)	-0.28	0.234	1	1.43	0.232
log2(brain size) ~ log2(upstream3)	-0.3	0.223	1	1.92	0.166
log2(brain size) ~ log2(exon1)	0.31	0.487	1	0.42	0.517
log2(brain size) ~ log2(intron)	0.35	0.399	1	0.78	0.377
log2(brain size) ~ log2(exon2)	0.28	0.286	1	0.97	0.324
log2(brain size) ~ log2(downstream)	0.18	0.474	1	0.16	0.693
log2(GI) ~ log2(upstream1)	0.01	0.073	1	0.01	0.929
log2(GI) ~ log2(upstream2)	-0.04	0.06	1	0.53	0.468
log2(GI) ~ log2(upstream3)	-0.06	0.048	1	1.51	0.219
log2(GI) ~ log2(exon1)	0.07	0.088	1	0.62	0.431
log2(GI) ~ log2(intron)	0.14	0.086	1	2.75	0.097
log2(GI) ~ log2(exon2)	0.1	0.086	1	1.33	0.25
log2(GI) ~ log2(downstream)	0.03	0.114	1	0.07	0.787

## Sheet: 3c
Model	Value	Std.Error	df	L.Ratio	LRT p-value	Cell line
log2(GI) ~ log2(intron)	0.2	0.059	1	8.66	0.003	human1
log2(GI) ~ log2(intron)	0.14	0.071	1	3.81	0.051	human2
log2(GI) ~ log2(intron)	0.1	0.059	1	3.31	0.069	macaque

## Sheet: 3d
GO.ID	Term	Annotated	Significant	Expected	Fisher's P
GO:0010817	regulation of hormone levels	26	5	1.47	0.011
GO:0042127	regulation of cell population proliferation	117	12	6.6	0.012
GO:0008285	negative regulation of cell population proliferation	61	8	3.44	0.012
GO:0043523	regulation of neuron apoptotic process	20	4	1.13	0.02
GO:1901615	organic hydroxy compound metabolic process	21	4	1.18	0.024
GO:0051402	neuron apoptotic process	23	4	1.3	0.033
GO:1903706	regulation of hemopoiesis	47	6	2.65	0.037
GO:0006325	chromatin organization	35	5	1.97	0.037
GO:0008283	cell population proliferation	135	12	7.62	0.039
GO:0090596	sensory organ morphogenesis	36	5	2.03	0.042
GO:0006259	DNA metabolic process	25	4	1.41	0.044
